# Supplementary material for: Acetohydroxamic acid salts: mild, simple and effective degradation reagents to counter Novichok nerve agents
Source: Royal Society of Chemistry journal article supplement (doi:10.1039/d4ra02038c), 2024-01-01
Supplement: d4ra02038c1.pdf [file d4ra02038c1.pdf]

## Supporting information

# Acetohydroxamic Acids Salts: Mild, Simple and Effective Degradation Reagents to Counter Novichok Nerve Agents

Boris Smolkin,<sup>a,\*</sup> Victoria Nahum,<sup>a,\*</sup> Eugenia Bloch-Shilderman,<sup>b</sup> Uri Nili,<sup>b</sup> Gil Fridkin,<sup>a</sup> Nissan Ashkenazi<sup>a,c,\*</sup>

<sup>a</sup> Department of organic chemistry, Israel institute for Biological Research, P.O. Box 19, Ness Ziona 74100, Israel, <sup>b</sup> Department of pharmacology, Israel Institute for Biological Research, P.O. Box 19, Ness Ziona 74100, Israel, <sup>c</sup> Department of Chemical Sciences, Ariel University, Ariel 4070000, Israel.

## Table of Content

|   |                                        |   |
|---|----------------------------------------|---|
| 1 | Chemicals.....                         | 2 |
| 2 | Abbreviations.....                     | 3 |
| 3 | Kinetic Analysis and NMR spectra ..... | 4 |

# 1 Chemicals

The following active pharmaceutical ingredients, reagents and solvents (HPLC grade): Acetohydroxamic Acid (AHA), Salicylhydroxamic acid (SHA), Caprylhydroxamic acid (CHA), Bufexamac (BUF), diethylamine (DEA), ethanolamine (Olamine), pyrrolidinoethanol (Epolamine), piperazine, Dimethyl sulfoxide (DMSO), propylene glycol (PG), polyethylene glycol monoethyl ether (mPEG), sodium hydroxide and potassium hydroxide were purchased from commercial suppliers and used without further purification. Deionized water was obtained from a laboratory water purification system.

N-(1-(diethylamino)ethylidene)-P-methylphosphonamidic fluoride (A230), methyl (E)-(1-(diethylamino)ethylidene)phosphoramidofluoridate (A232), ethyl (E)-(1-(diethylamino)ethylidene)phosphoramidofluoridate (A234) Was synthesized in house (>95% purity).

## 2 Abbreviations

|           |                                                      |
|-----------|------------------------------------------------------|
| AChE      | acetyl choline esterase                              |
| AHA       | Acetohydroxamic acid                                 |
| BUF       | Bufexamac                                            |
| CHA       | Caprylhydroxamic acid                                |
| CWAs      | chemical warfare agents                              |
| DEA       | Diethylamine                                         |
| DMSO      | Dimethylsulfoxide                                    |
| epolamine | N-(2-hydroxyethyl)pyrrolidine                        |
| Eq.       | Equivalent                                           |
| FDA       | U.S. Food and Drug Administration                    |
| MOFs      | Metal–organic frameworks                             |
| mPEG      | Poly(ethylene glycol) monomethyl ether               |
| N.R       | No Reaction                                          |
| NMR       | Nuclear Magnetic Resonance                           |
| Olamine   | Ethanolamine                                         |
| OPCW      | Organisation for the Prohibition of Chemical Weapons |
| OPs       | organophosphorus compounds                           |
| PG        | Propylene glycol                                     |
| RSDL      | Reactive Skin Decontamination Lotion                 |
| SHA       | Salicylhydroxamic acid                               |
| $t_{1/2}$ | Half-life time                                       |

### 3 Kinetic Analysis and NMR spectra

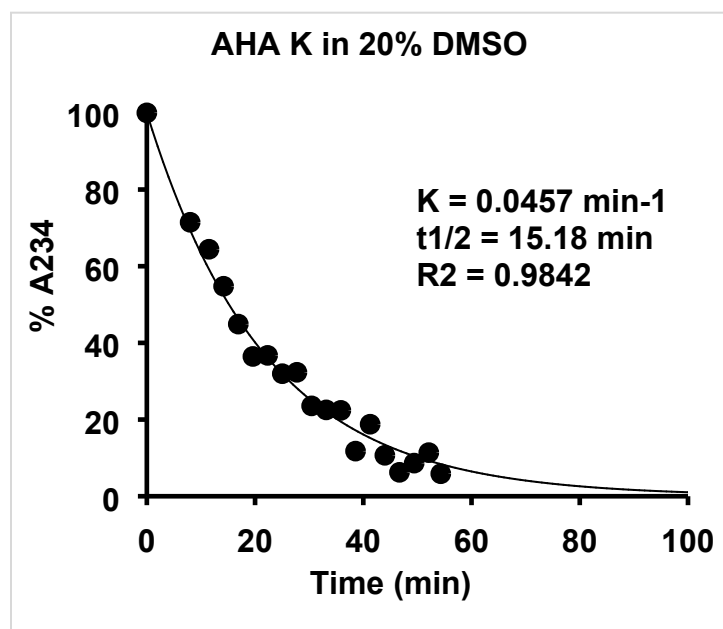

| Time (min) | % A234 |
|------------|--------|
| 0.0        | 100.00 |
| 8.0        | 71.46  |
| 11.5       | 64.42  |
| 14.2       | 54.77  |
| 16.9       | 44.90  |
| 19.6       | 36.46  |
| 22.3       | 36.74  |
| 25.0       | 31.97  |
| 27.7       | 32.33  |
| 30.5       | 23.57  |
| 33.2       | 22.52  |
| 35.9       | 22.40  |
| 38.6       | 11.77  |
| 41.3       | 18.79  |
| 44.0       | 10.68  |
| 46.7       | 6.24   |
| 49.4       | 8.64   |
| 52.1       | 11.37  |
| 54.3       | 5.88   |

**Figure S1.** Decomposition kinetic profile of A234 by AHA K in H<sub>2</sub>O/DMSO 4:1.

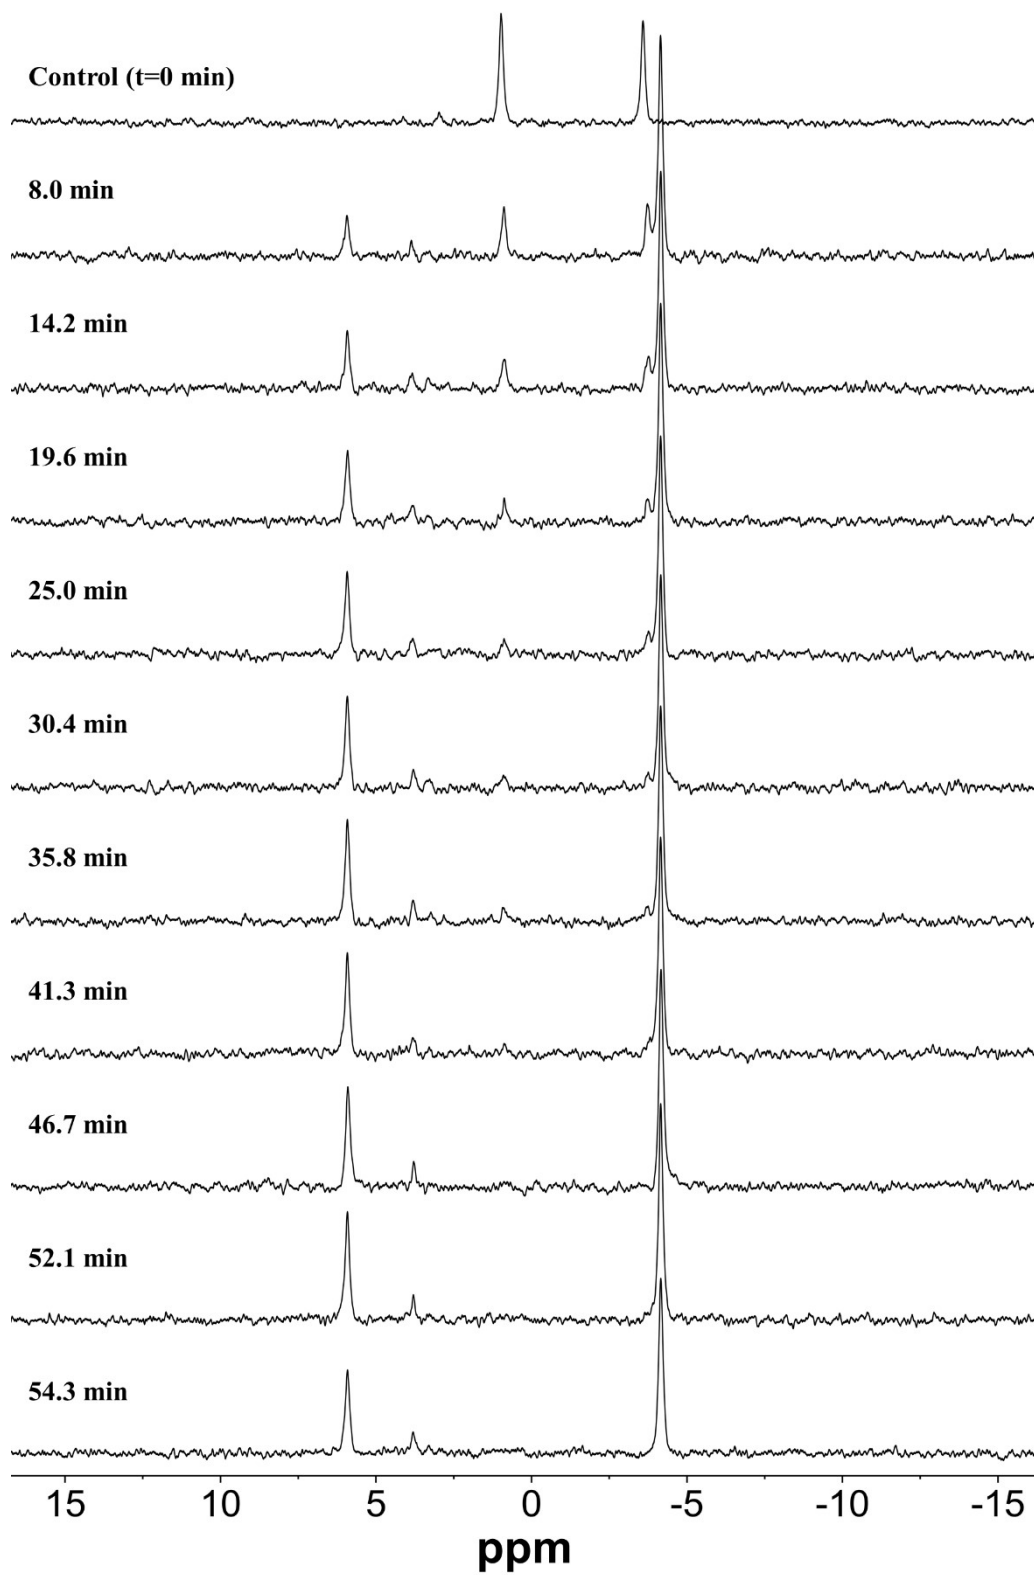

**Figure S2.** Stacked  $^{31}\text{P}$  NMR spectra presenting the decomposition of A234 by AHA K in  $\text{H}_2\text{O}/\text{DMSO}$  4:1.

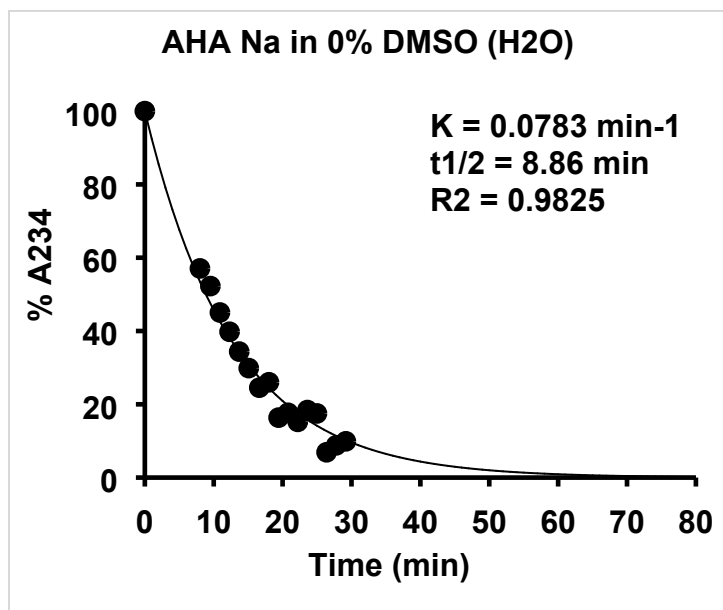

| Time (min) | % A234 |
|------------|--------|
| 0.0        | 100.00 |
| 8.0        | 57.08  |
| 9.5        | 52.26  |
| 10.9       | 45.05  |
| 12.3       | 39.79  |
| 13.7       | 34.38  |
| 15.1       | 29.87  |
| 16.6       | 24.54  |
| 18.0       | 26.01  |
| 19.4       | 16.36  |
| 20.8       | 17.68  |
| 22.2       | 15.21  |
| 23.6       | 18.43  |
| 25.0       | 17.50  |
| 26.4       | 6.91   |
| 27.8       | 8.81   |
| 29.2       | 9.90   |

**Figure S3.** Decomposition kinetic profile of A234 by AHA Na in H<sub>2</sub>O.

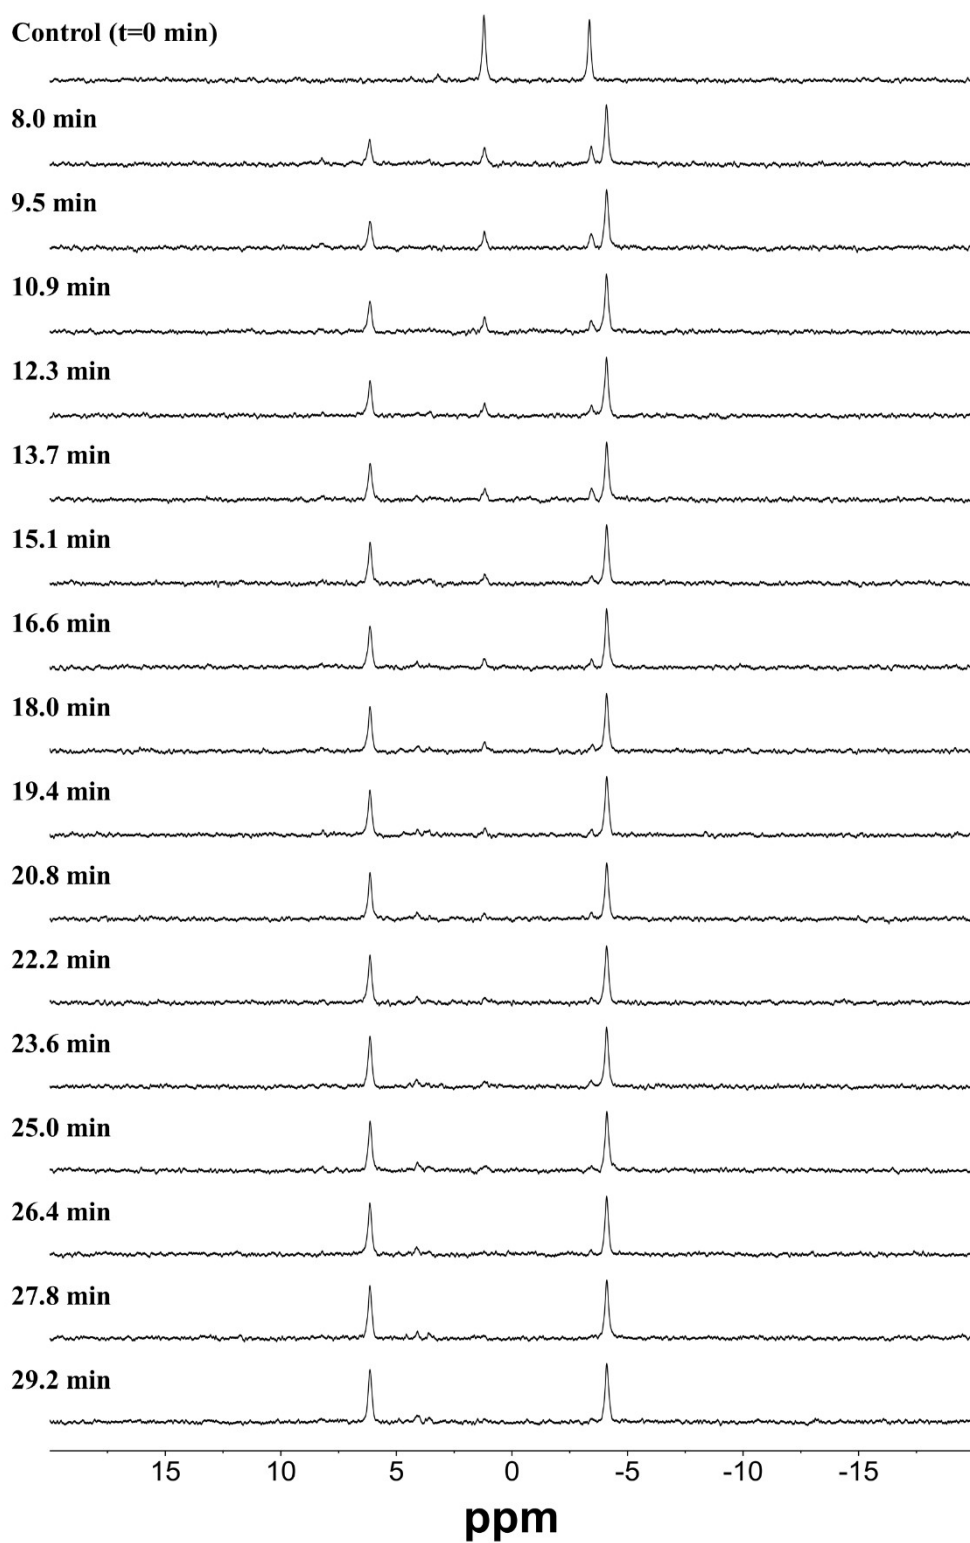

**Figure S4.** Stacked  $^{31}\text{P}$  NMR spectra presenting the decomposition of A234 by AHA Na in  $\text{H}_2\text{O}$ .

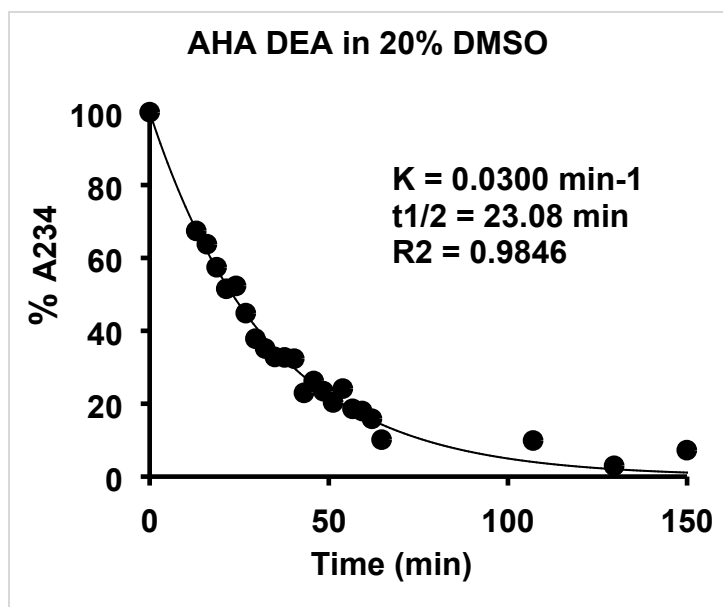

| Time (min) | % A234 |
|------------|--------|
| 0.0        | 100.00 |
| 13.0       | 67.42  |
| 16.0       | 63.78  |
| 18.7       | 57.45  |
| 21.4       | 51.54  |
| 24.1       | 52.33  |
| 26.8       | 44.86  |
| 29.5       | 37.85  |
| 32.2       | 35.15  |
| 34.9       | 32.83  |
| 37.7       | 32.72  |
| 40.4       | 32.36  |
| 43.1       | 22.98  |
| 45.8       | 26.24  |
| 48.5       | 23.44  |
| 51.2       | 20.35  |
| 53.9       | 24.15  |
| 56.6       | 18.60  |
| 59.3       | 18.00  |
| 62.0       | 15.87  |
| 64.7       | 10.14  |
| 107.0      | 9.91   |
| 129.6      | 2.97   |
| 149.9      | 7.26   |

**Figure S5.** Decomposition kinetic profile of A234 by AHA DEA in H<sub>2</sub>O/DMSO 4:1.



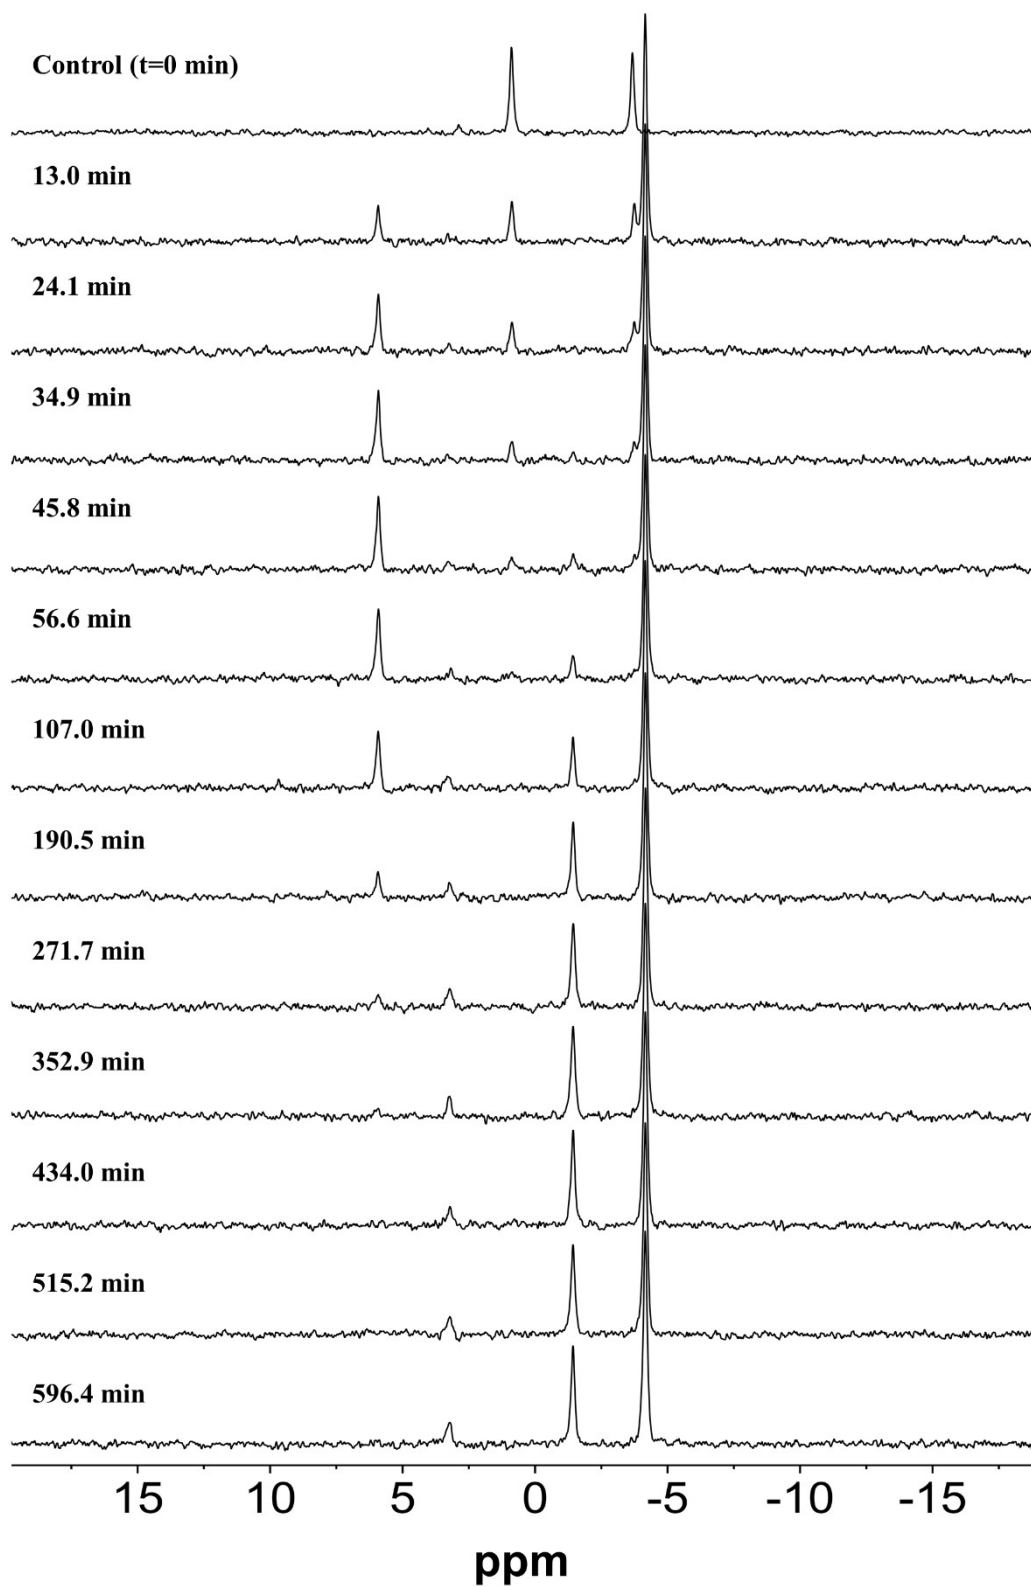

**Figure S6.** Stacked  $^{31}\text{P}$  NMR spectra presenting the decomposition of A234 by AHA DEA in  $\text{H}_2\text{O}/\text{DMSO}$  4:1.

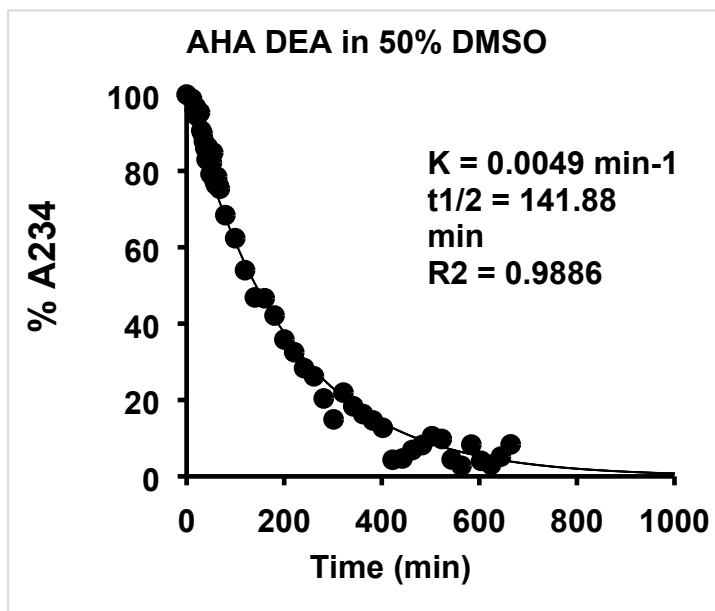

| Time (min) | % A234 | Time (min) | % A234 |
|------------|--------|------------|--------|
| 0.0        | 100.00 | 160.1      | 46.65  |
| 11.0       | 98.88  | 180.2      | 42.12  |
| 16.5       | 96.02  | 200.4      | 35.84  |
| 19.3       | 96.68  | 220.6      | 32.52  |
| 22.0       | 94.32  | 240.7      | 28.36  |
| 24.7       | 95.01  | 260.9      | 26.22  |
| 27.4       | 95.32  | 281.1      | 20.41  |
| 30.1       | 90.56  | 301.2      | 14.93  |
| 32.8       | 89.77  | 321.4      | 21.94  |
| 35.5       | 87.72  | 341.6      | 18.36  |
| 38.2       | 85.97  | 361.8      | 16.31  |
| 40.9       | 82.98  | 381.9      | 14.64  |
| 43.6       | 86.23  | 402.1      | 12.72  |
| 46.3       | 83.99  | 422.3      | 4.34   |
| 49.1       | 79.17  | 442.4      | 4.69   |
| 51.8       | 82.11  | 462.6      | 6.90   |
| 54.5       | 84.81  | 482.8      | 8.21   |
| 57.2       | 77.42  | 502.9      | 10.52  |
| 59.9       | 76.40  | 523.1      | 9.79   |
| 62.6       | 78.45  | 543.3      | 4.43   |
| 65.3       | 76.31  | 563.4      | 2.76   |
| 68.0       | 75.34  | 583.6      | 8.32   |
| 79.4       | 68.41  | 603.8      | 4.07   |
| 99.6       | 62.38  | 624.0      | 3.04   |
| 119.7      | 54.00  | 644.1      | 5.18   |
| 139.9      | 46.87  | 664.3      | 8.38   |

**Figure S7.** Decomposition kinetic profile of A234 by AHA DEA in H<sub>2</sub>O/DMSO 1:1.

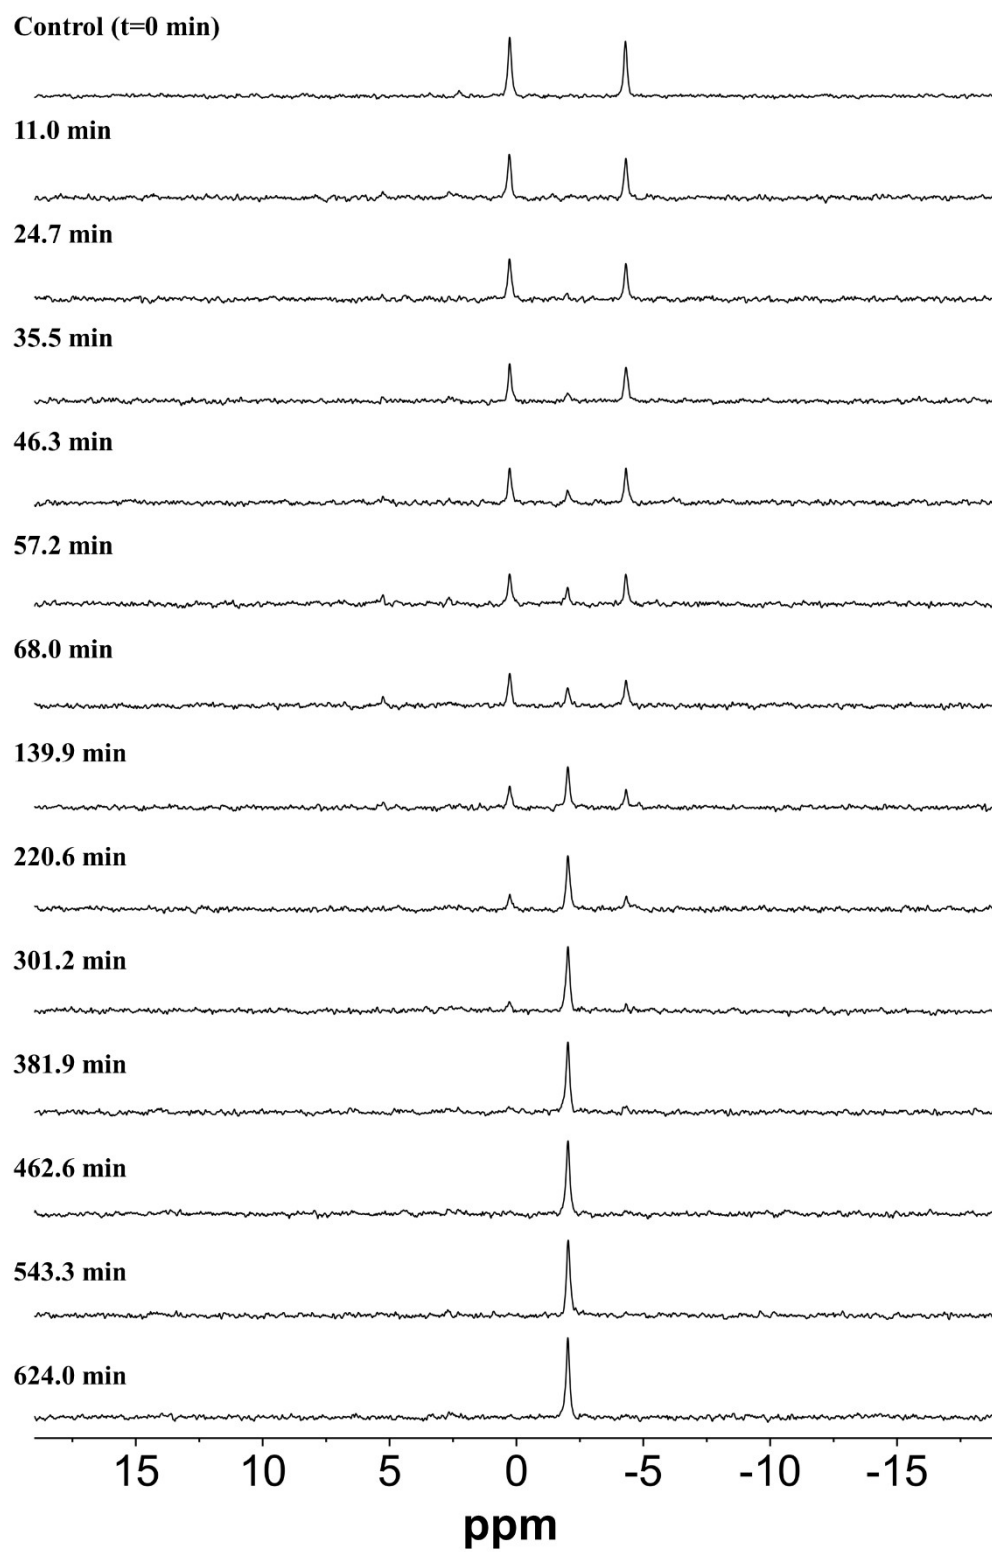

**Figure S8.** Stacked  $^{31}\text{P}$  NMR spectra presenting the decomposition of A234 by AHA DEA in  $\text{H}_2\text{O}/\text{DMSO}$  1:1.

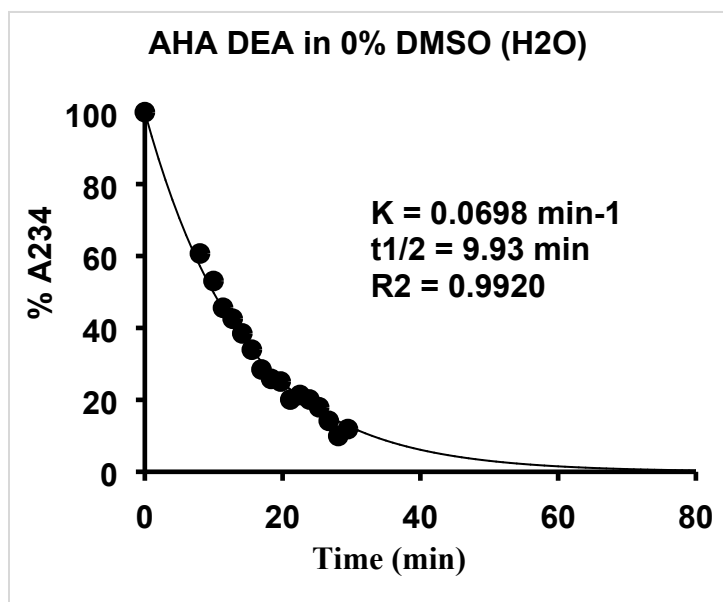

| Time (min) | % A234 |
|------------|--------|
| 0.0        | 100.00 |
| 8.0        | 60.70  |
| 10.0       | 53.05  |
| 11.4       | 45.60  |
| 12.8       | 42.56  |
| 14.2       | 38.47  |
| 15.5       | 33.95  |
| 16.9       | 28.45  |
| 18.3       | 25.84  |
| 19.7       | 25.10  |
| 21.1       | 20.08  |
| 22.5       | 21.36  |
| 23.9       | 20.10  |
| 25.3       | 17.94  |
| 26.7       | 14.17  |
| 28.1       | 9.96   |
| 29.5       | 11.88  |

**Figure S9.** Decomposition kinetic profile of A234 by AHA DEA in H<sub>2</sub>O.

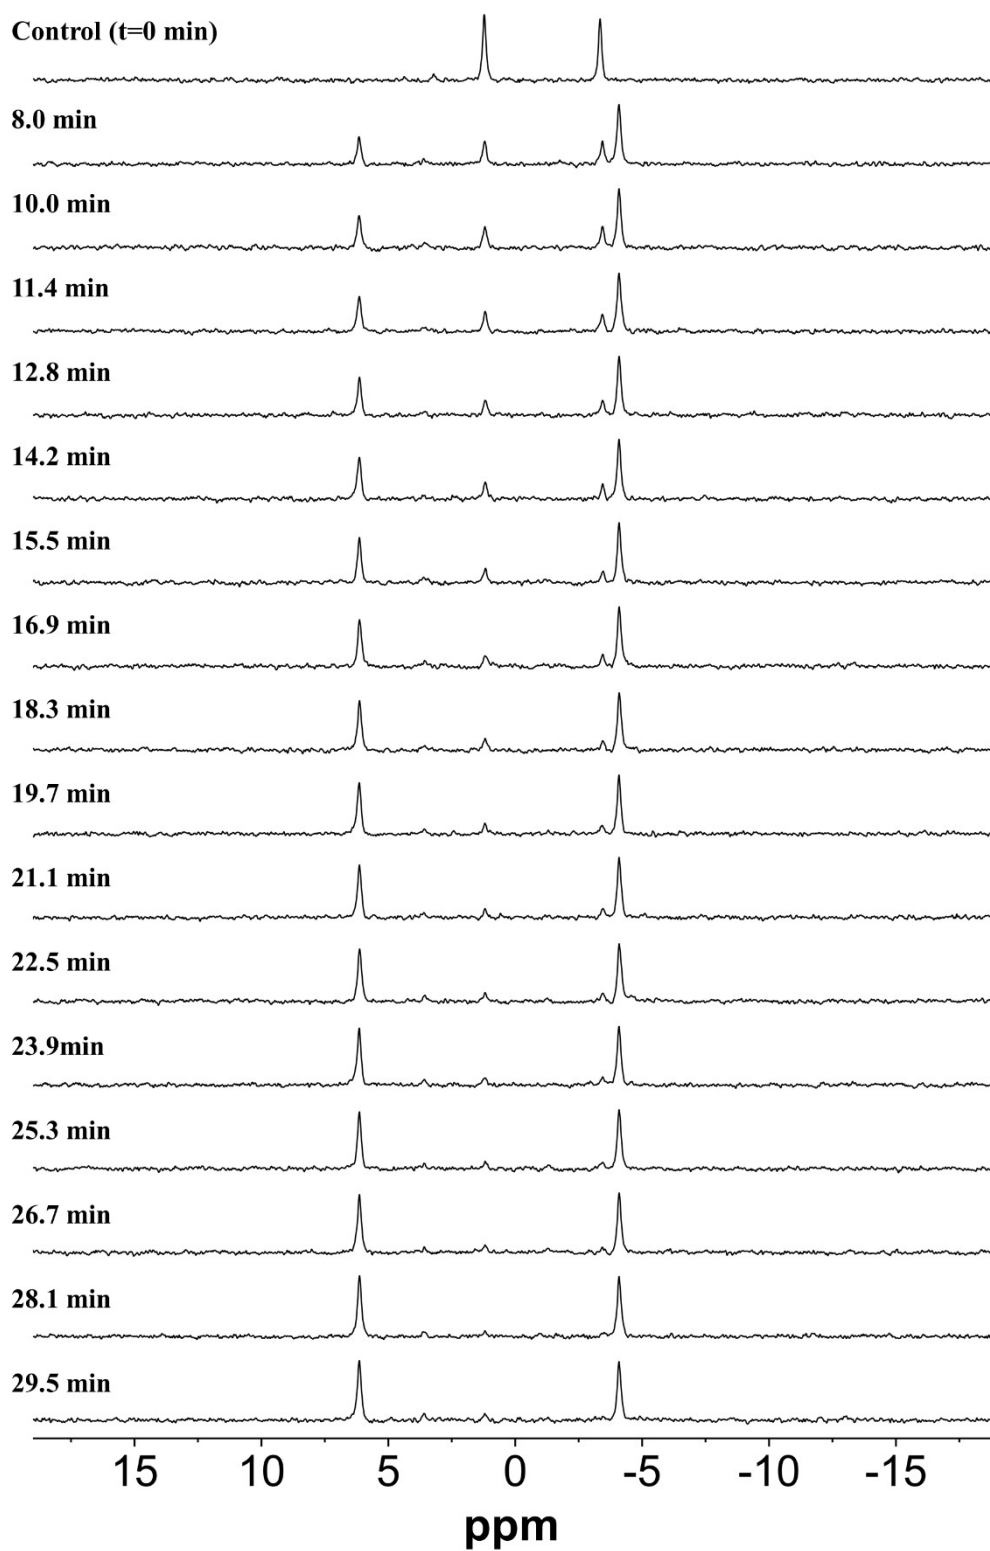

**Figure S10.** Stacked  $^{31}\text{P}$  NMR spectra presenting the decomposition of A234 by AHA DEA in  $\text{H}_2\text{O}$ .

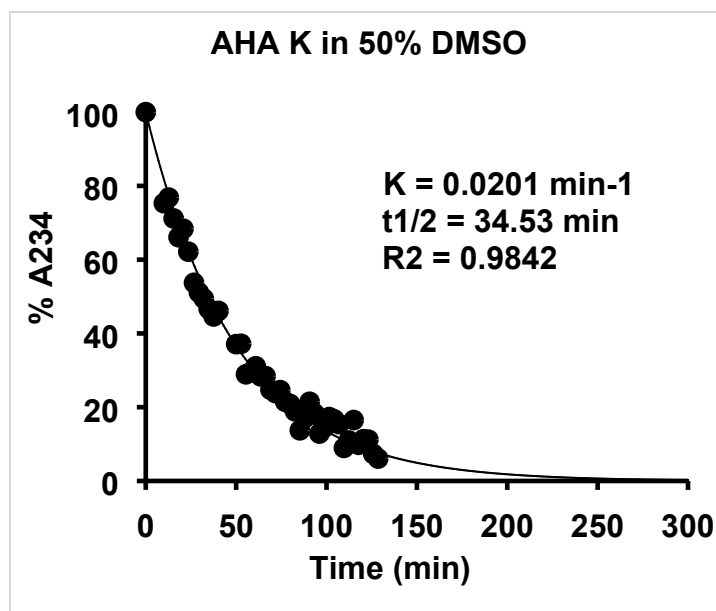

| Time (min) | % A234 | Time (min) | % A234 |
|------------|--------|------------|--------|
| 0.0        | 100.00 | 74.4       | 24.63  |
| 10.0       | 75.31  | 77.1       | 21.49  |
| 12.7       | 76.83  | 79.8       | 20.88  |
| 15.4       | 71.17  | 82.5       | 18.89  |
| 18.1       | 66.09  | 85.2       | 13.74  |
| 20.9       | 68.37  | 88.0       | 17.06  |
| 23.6       | 62.16  | 90.7       | 21.47  |
| 26.7       | 53.73  | 93.4       | 18.31  |
| 29.4       | 51.09  | 96.1       | 12.86  |
| 32.1       | 49.44  | 98.8       | 14.54  |
| 34.8       | 46.64  | 101.5      | 17.32  |
| 37.5       | 44.61  | 104.2      | 16.70  |
| 40.2       | 46.11  | 106.9      | 15.41  |
| 50.0       | 37.10  | 109.6      | 8.97   |
| 52.7       | 37.19  | 112.3      | 10.97  |
| 55.4       | 28.92  | 115.0      | 16.51  |
| 58.2       | 29.53  | 117.7      | 9.81   |
| 60.9       | 31.10  | 120.5      | 11.32  |
| 63.6       | 28.36  | 123.2      | 11.21  |
| 66.3       | 28.44  | 125.867    | 7.32   |
| 69.0       | 24.74  | 128.567    | 6.07   |
| 71.7       | 23.85  |            |        |

**Figure S11.** Decomposition kinetic profile of A234 by AHA K in H<sub>2</sub>O/DMSO 1:1.

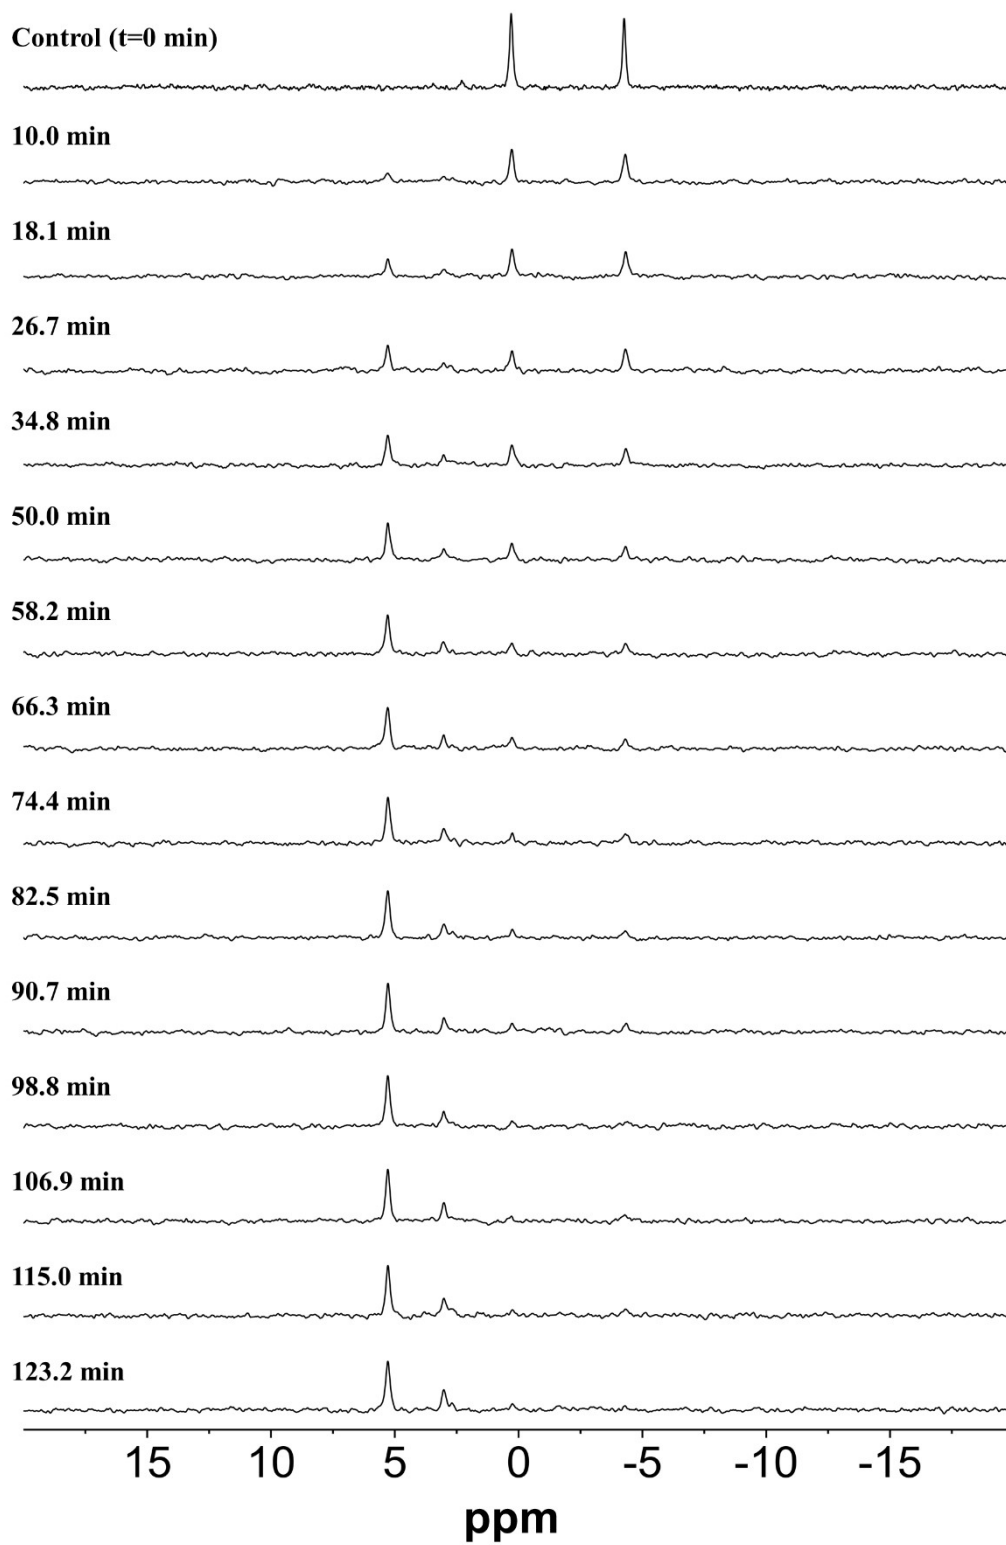

**Figure S12.** Stacked  $^{31}\text{P}$  NMR spectra presenting the decomposition of A234 by AHA K in  $\text{H}_2\text{O}/\text{DMSO}$  1:1.

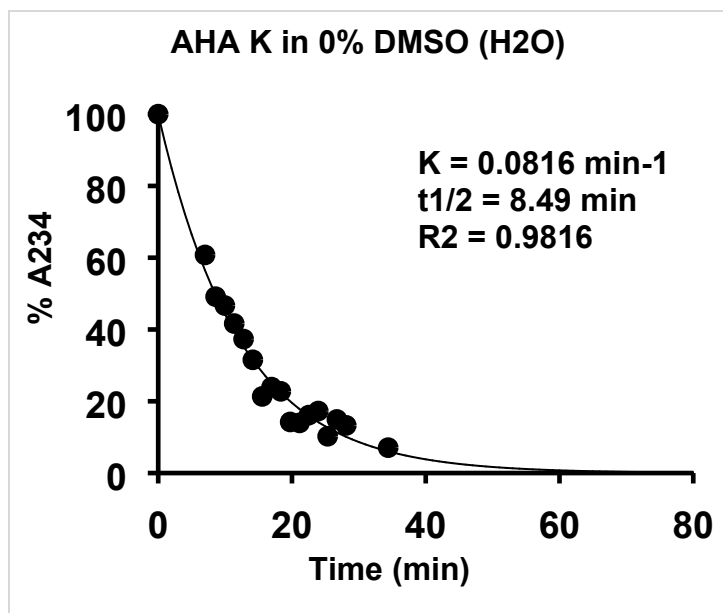

| <b>Time (min)</b> | <b>% A234</b> |
|-------------------|---------------|
| 0.0               | 100.00        |
| 7.0               | 60.77         |
| 8.6               | 49.15         |
| 10.0              | 46.67         |
| 11.4              | 41.66         |
| 12.8              | 37.33         |
| 14.2              | 31.55         |
| 15.6              | 21.35         |
| 17.0              | 23.95         |
| 18.3              | 22.76         |
| 19.7              | 14.23         |
| 21.1              | 13.97         |
| 22.5              | 16.14         |
| 23.9              | 17.28         |
| 25.3              | 10.25         |
| 26.7              | 14.94         |
| 28.1              | 13.28         |
| 34.4              | 7.07          |

**Figure S13.** Decomposition kinetic profile of A234 by AHA K in H<sub>2</sub>O.



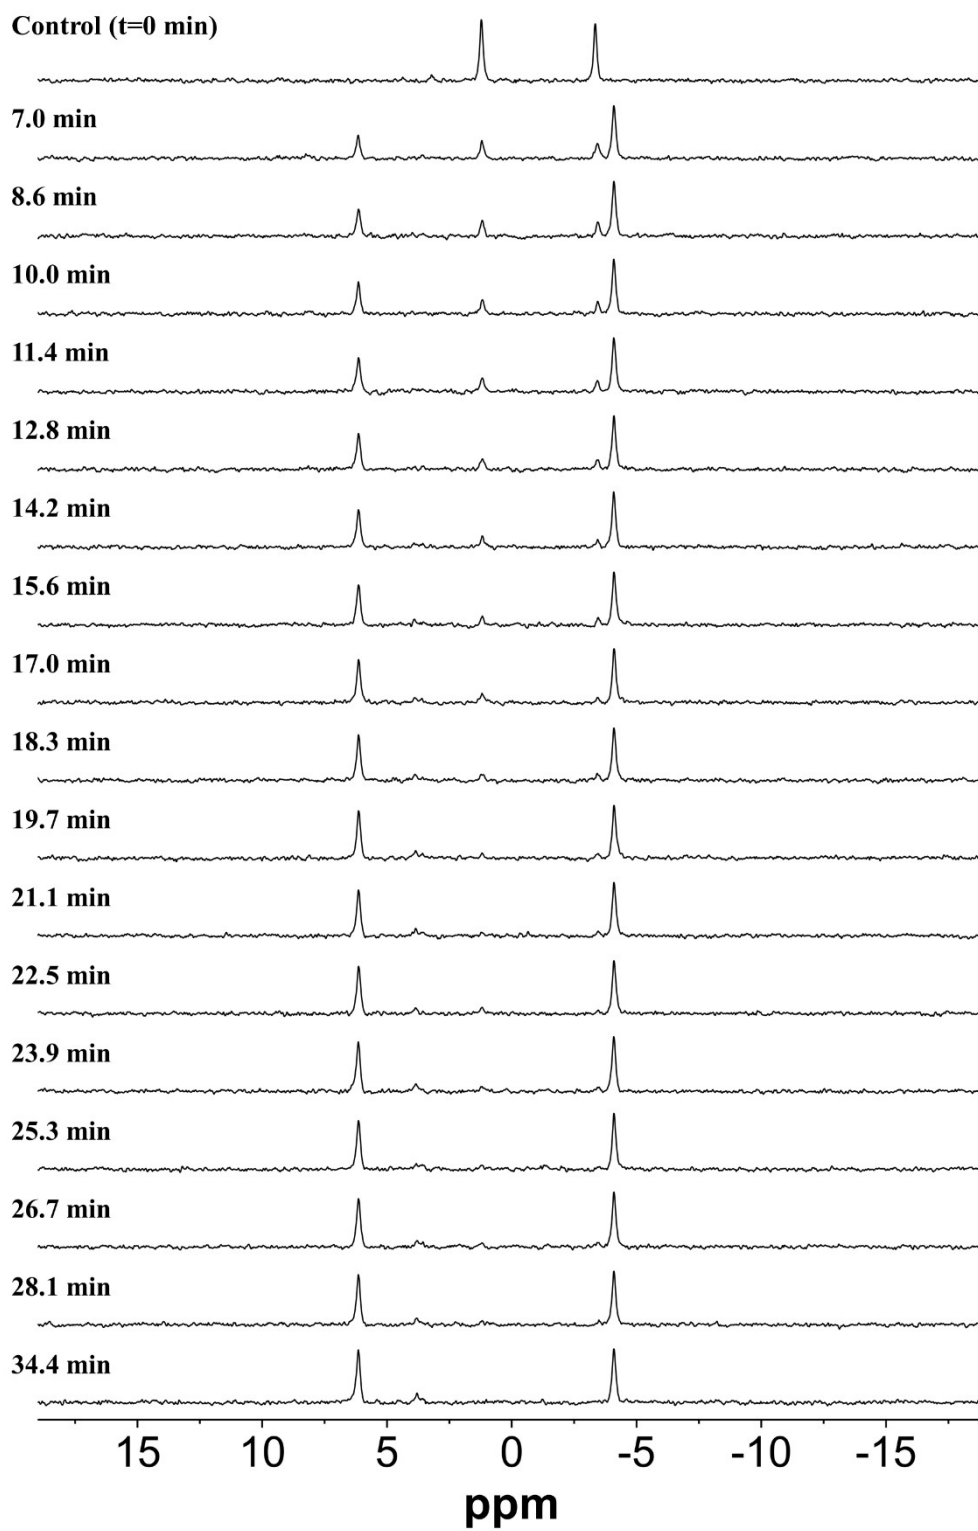

**Figure S14.** Stacked  $^{31}\text{P}$  NMR spectra presenting the decomposition of A234 by AHA K in  $\text{H}_2\text{O}$ .

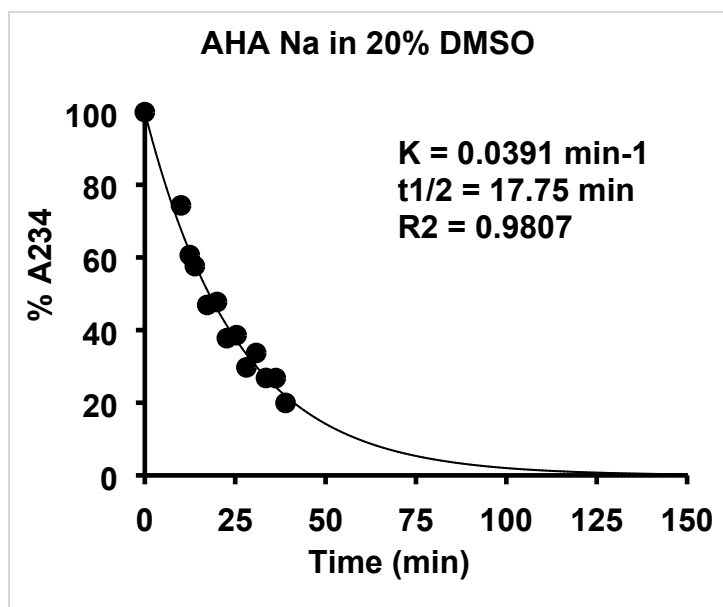

| Time (min) | % A234 |
|------------|--------|
| 0.0        | 100.00 |
| 10.0       | 74.34  |
| 12.4       | 60.65  |
| 13.8       | 57.62  |
| 17.3       | 46.92  |
| 20.0       | 47.73  |
| 22.7       | 37.78  |
| 25.4       | 38.61  |
| 28.1       | 29.73  |
| 30.8       | 33.70  |
| 33.5       | 26.82  |
| 36.2       | 26.79  |
| 38.9       | 19.95  |

**Figure S15.** Decomposition kinetic profile of A234 by AHA Na in H<sub>2</sub>O/DMSO 4:1.

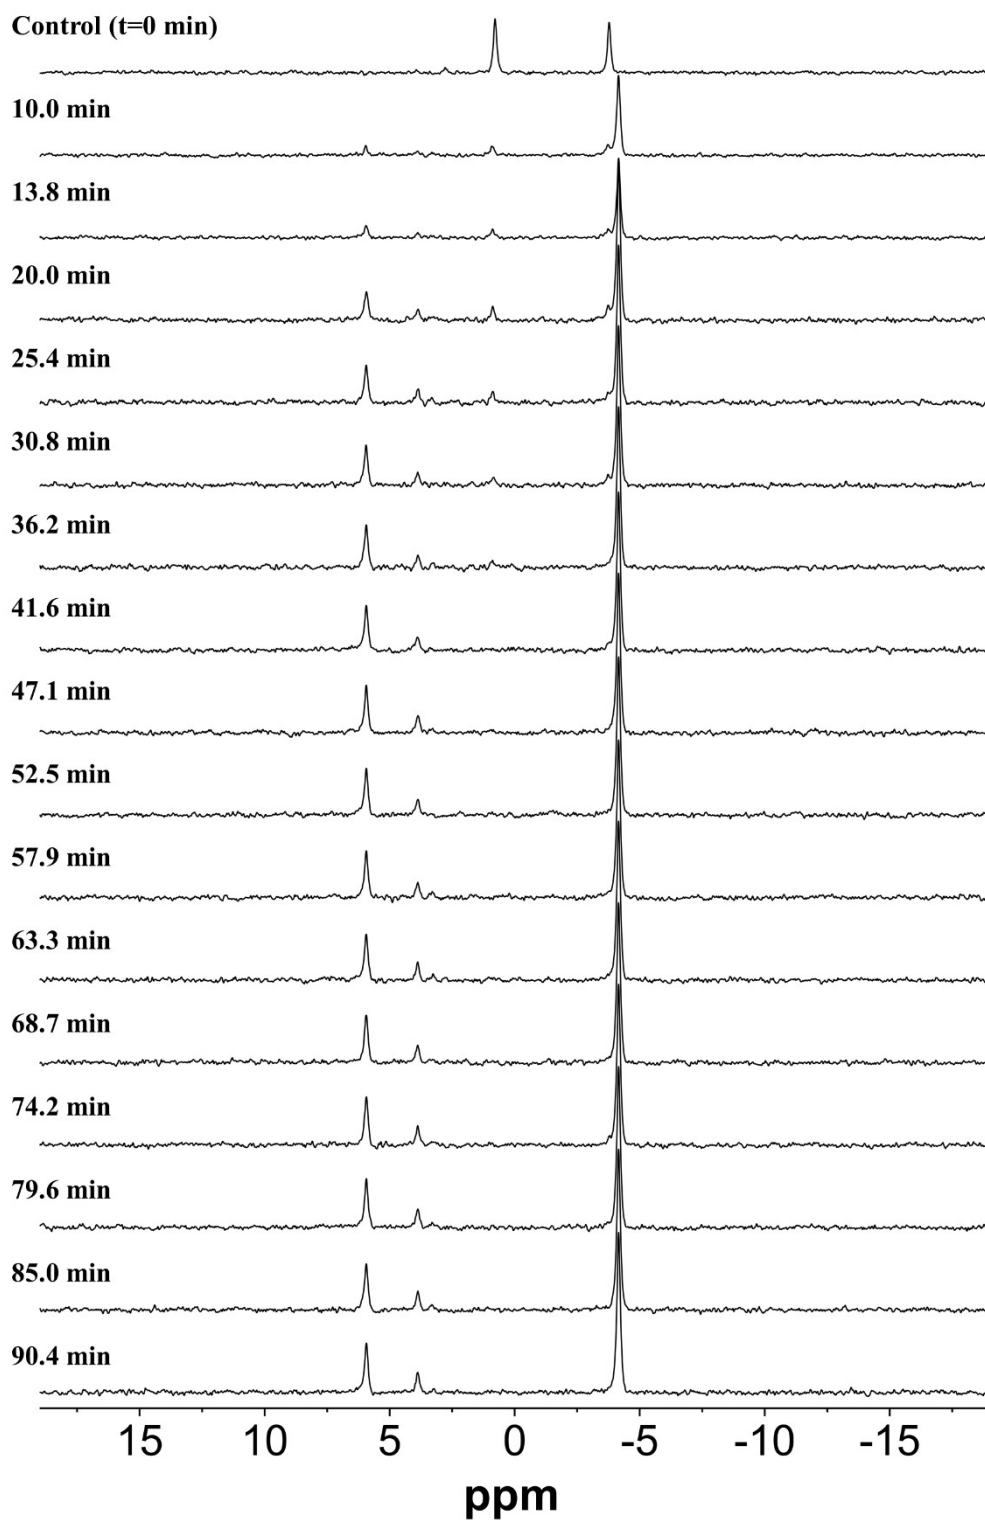

**Figure S16.** Stacked  $^{31}\text{P}$  NMR spectra presenting the decomposition of A234 by AHA Na in  $\text{H}_2\text{O}/\text{DMSO}$  4:1.

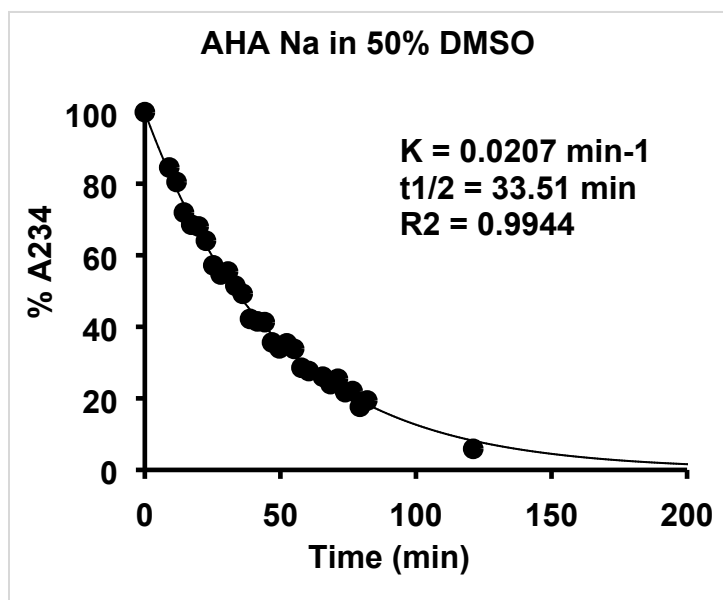

| Time (min) | % A234 |
|------------|--------|
| 0.0        | 100.00 |
| 9.0        | 84.53  |
| 11.7       | 80.48  |
| 14.4       | 71.94  |
| 17.1       | 68.55  |
| 19.8       | 68.05  |
| 22.5       | 64.06  |
| 25.3       | 57.18  |
| 28.0       | 54.62  |
| 30.7       | 55.45  |
| 33.4       | 51.49  |
| 36.1       | 49.23  |
| 38.8       | 42.21  |
| 41.5       | 41.52  |
| 44.2       | 41.30  |
| 46.9       | 35.64  |
| 49.6       | 33.98  |
| 52.4       | 35.38  |
| 55.1       | 33.83  |
| 57.8       | 28.56  |
| 60.5       | 27.63  |
| 65.6       | 26.07  |
| 68.5       | 23.98  |
| 71.2       | 25.48  |
| 73.9       | 21.73  |
| 76.6       | 22.04  |
| 79.3       | 17.65  |
| 82.0       | 19.41  |
| 121.1      | 5.89   |

**Figure S17.** Decomposition kinetic profile of A234 by AHA Na in H<sub>2</sub>O/DMSO 1:1.

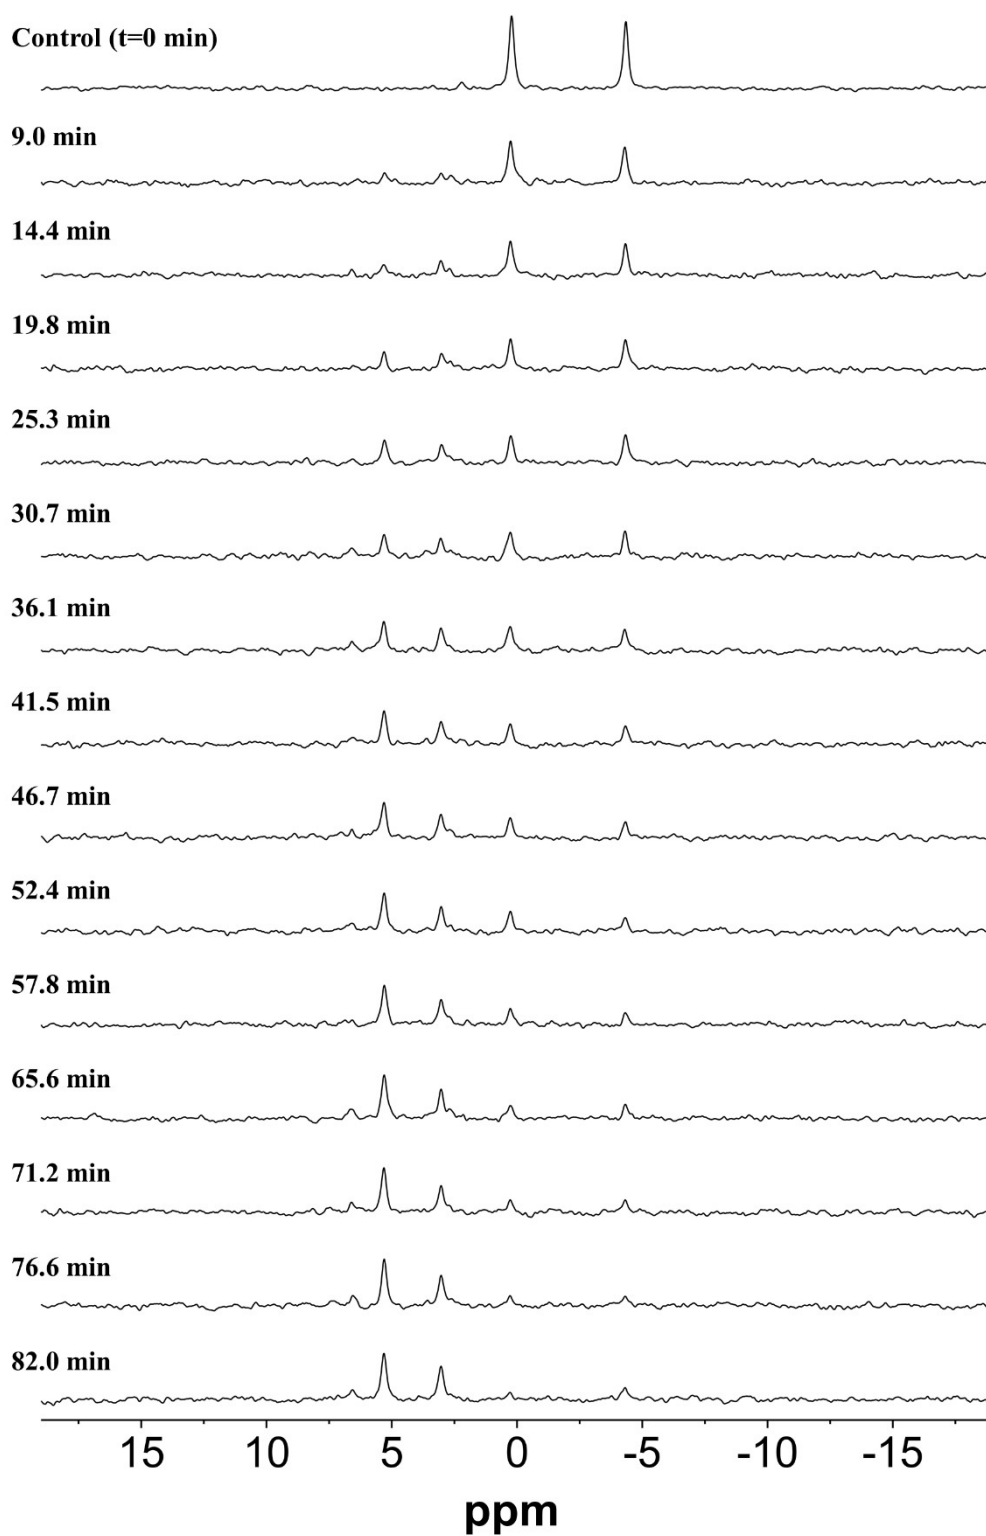

**Figure S18.** Stacked  $^{31}\text{P}$  NMR spectra presenting the decomposition of A234 by AHA Na in  $\text{H}_2\text{O}/\text{DMSO}$  1:1.

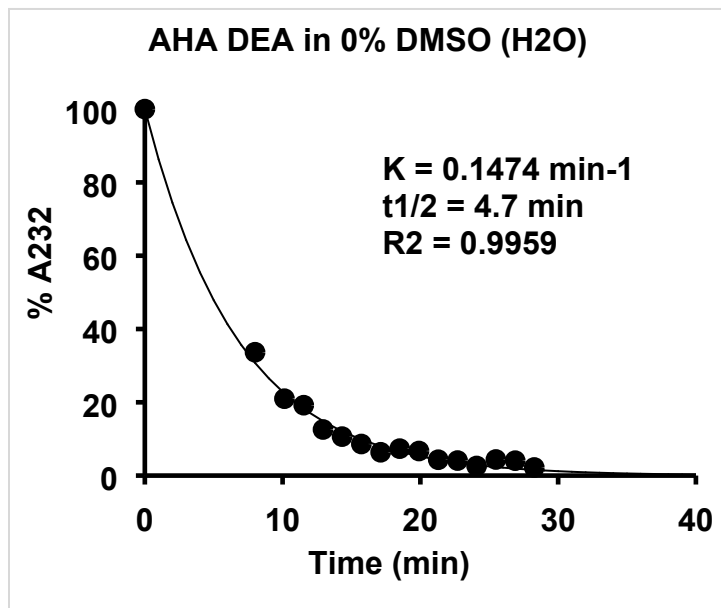

| Time (min) | % A232 |
|------------|--------|
| 0.0        | 100.00 |
| 8.0        | 33.66  |
| 10.1       | 20.98  |
| 11.5       | 19.21  |
| 12.9       | 12.58  |
| 14.3       | 10.64  |
| 15.7       | 8.62   |
| 17.1       | 6.36   |
| 18.5       | 7.35   |
| 19.9       | 6.71   |
| 21.3       | 4.33   |
| 22.7       | 4.10   |
| 24.1       | 2.62   |
| 25.5       | 4.39   |
| 26.9       | 4.07   |
| 28.3       | 2.21   |

**Figure S19.** Decomposition kinetic profile of A232 by AHA DEA in H<sub>2</sub>O.

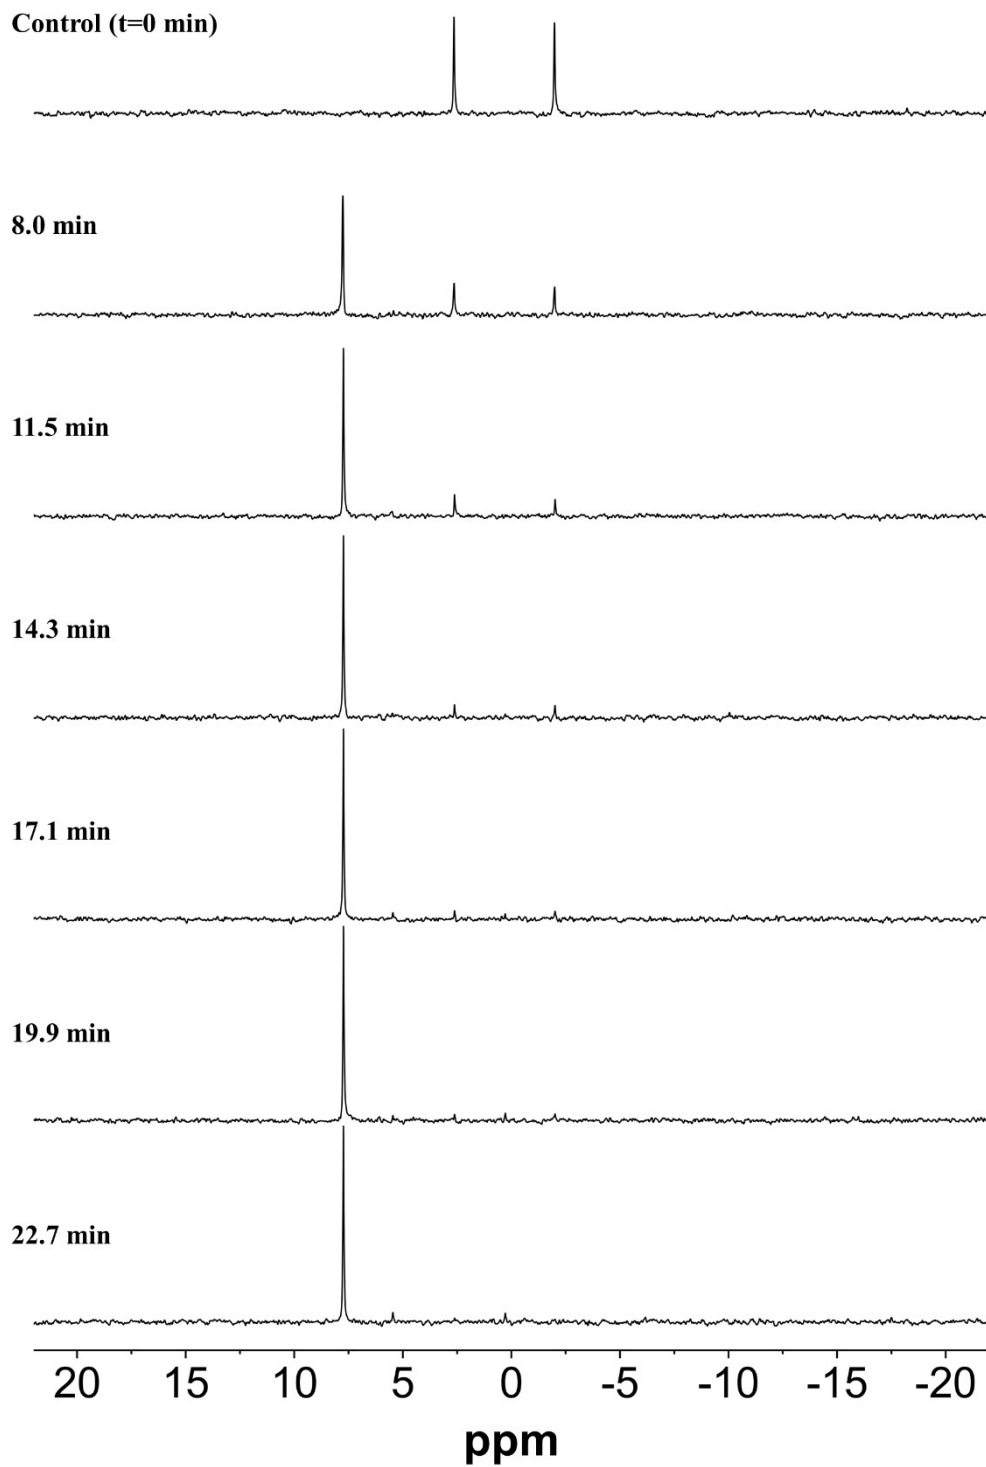

**Figure S20.** Stacked  $^{31}\text{P}$  NMR spectra presenting the decomposition of A232 by AHA DEA in  $\text{H}_2\text{O}$ .

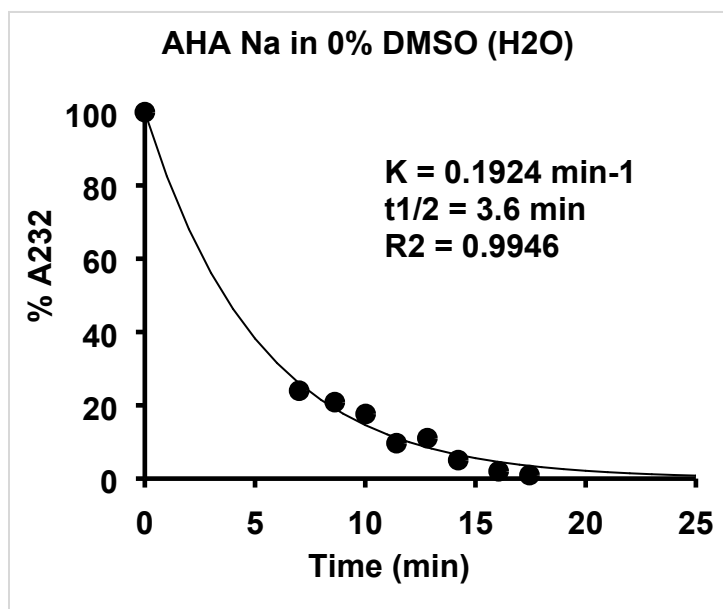

| Time (min) | % A232 |
|------------|--------|
| 0.0        | 100.00 |
| 7.0        | 23.99  |
| 8.6        | 20.87  |
| 10.0       | 17.64  |
| 11.4       | 9.67   |
| 12.8       | 11.03  |
| 14.2       | 5.05   |
| 16.1       | 2.00   |
| 17.5       | 0.96   |

**Figure S21.** Decomposition kinetic profile of A232 by AHA Na in H<sub>2</sub>O.



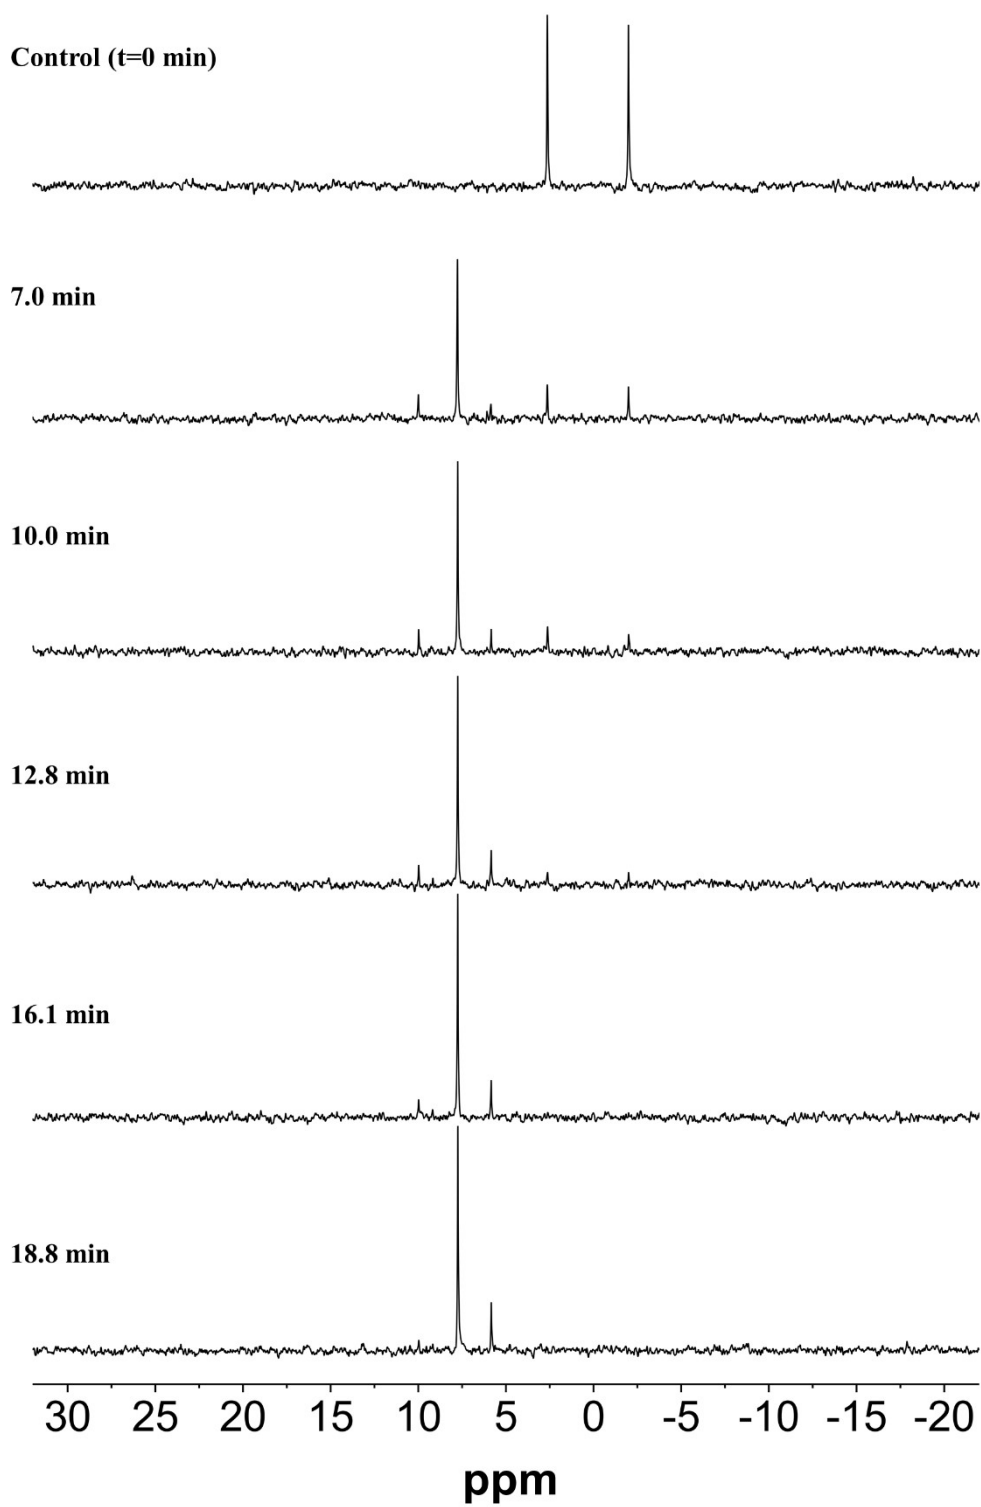

**Figure S22.** Stacked  $^{31}\text{P}$  NMR spectra presenting the decomposition of A232 by AHA Na in  $\text{H}_2\text{O}$ .

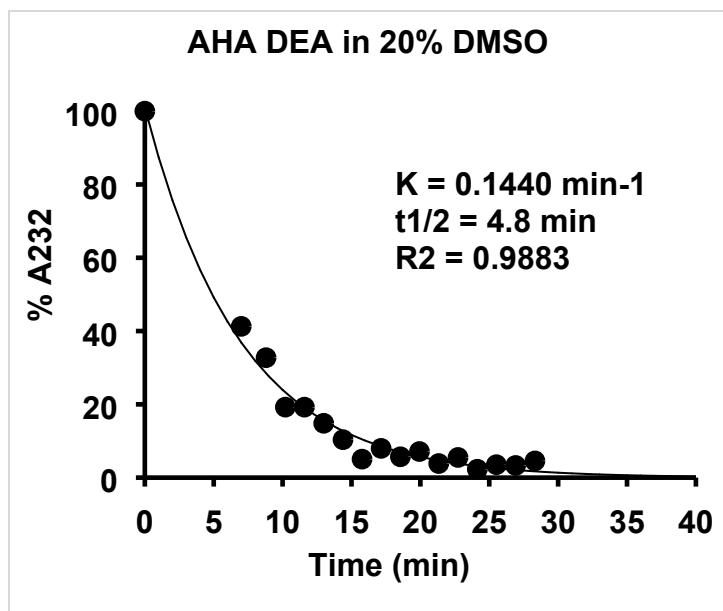

| Time (min) | % A232 |
|------------|--------|
| 0.0        | 100.00 |
| 7.0        | 41.28  |
| 8.8        | 32.74  |
| 10.2       | 19.24  |
| 11.6       | 19.24  |
| 13.0       | 14.83  |
| 14.4       | 10.36  |
| 15.8       | 5.05   |
| 17.2       | 7.98   |
| 18.6       | 5.69   |
| 19.9       | 7.13   |
| 21.3       | 3.85   |
| 22.7       | 5.51   |
| 24.1       | 2.29   |
| 25.5       | 3.53   |
| 26.9       | 3.32   |
| 28.3       | 4.56   |

**Figure S23.** Decomposition kinetic profile of A232 by AHA DEA in H<sub>2</sub>O/DMSO 4:1.

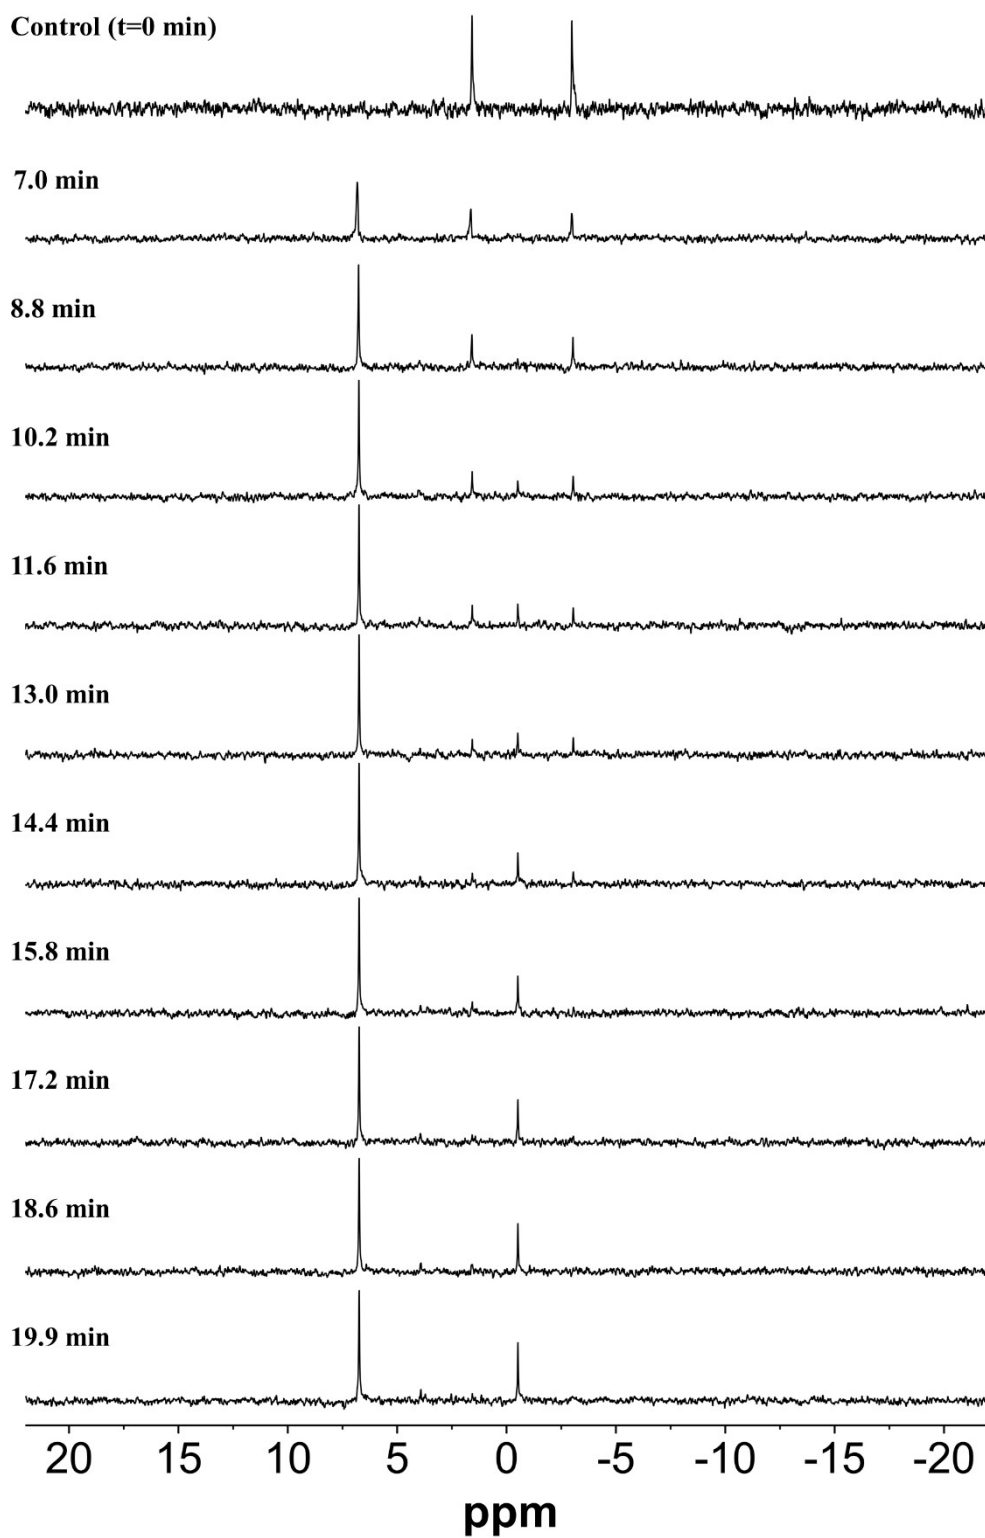

**Figure S24.** Stacked  $^{31}\text{P}$  NMR spectra presenting the decomposition of A232 by AHA DEA in  $\text{H}_2\text{O}/\text{DMSO}$  4:1.

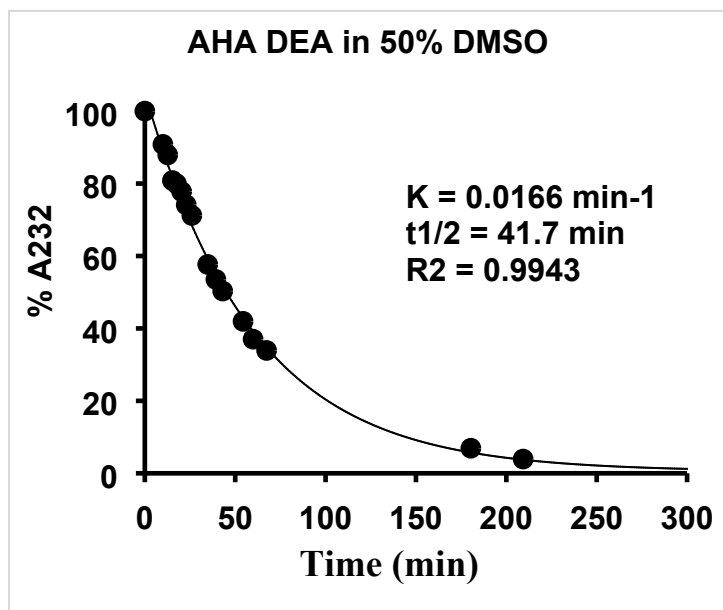

| Time (min) | % A232 |
|------------|--------|
| 0.0        | 100.00 |
| 10.0       | 90.82  |
| 12.7       | 87.91  |
| 15.3       | 80.83  |
| 17.5       | 79.97  |
| 20.4       | 77.78  |
| 22.9       | 74.12  |
| 26.0       | 71.19  |
| 34.8       | 57.66  |
| 39.3       | 53.52  |
| 43.1       | 50.31  |
| 54.3       | 41.95  |
| 59.9       | 37.04  |
| 67.4       | 33.92  |
| 180.4      | 6.92   |
| 209.3      | 3.93   |

**Figure S25.** Decomposition kinetic profile of A232 by AHA DEA in H<sub>2</sub>O/DMSO 1:1.

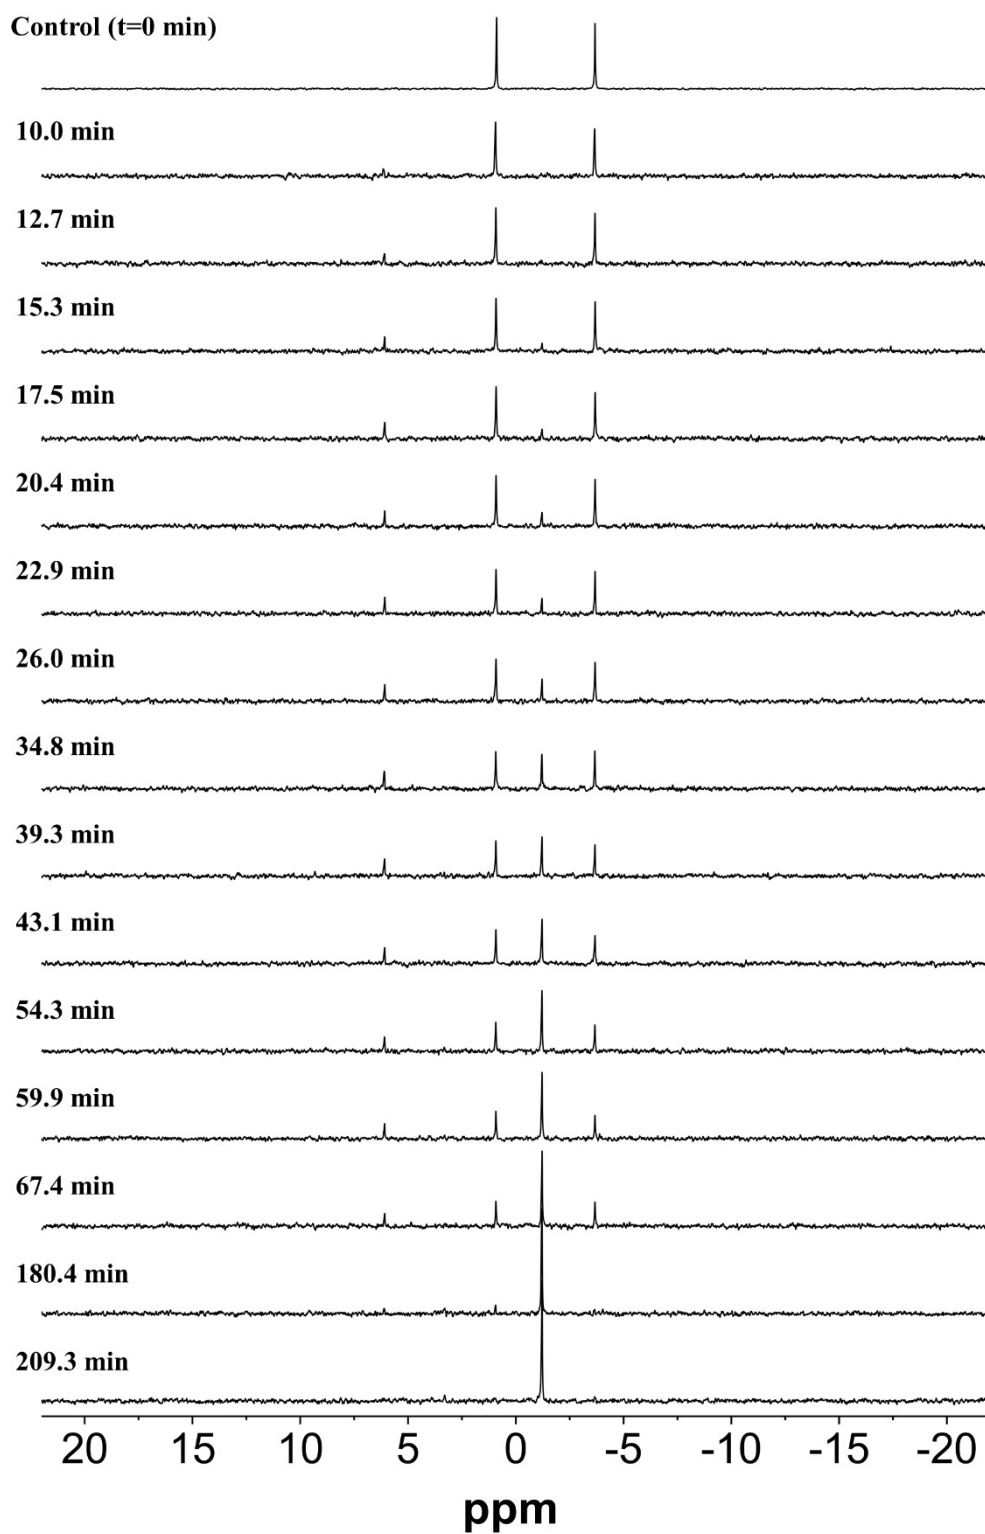

**Figure S26.** Stacked  $^{31}\text{P}$  NMR spectra presenting the decomposition of A232 by AHA DEA in  $\text{H}_2\text{O}/\text{DMSO}$  1:1.

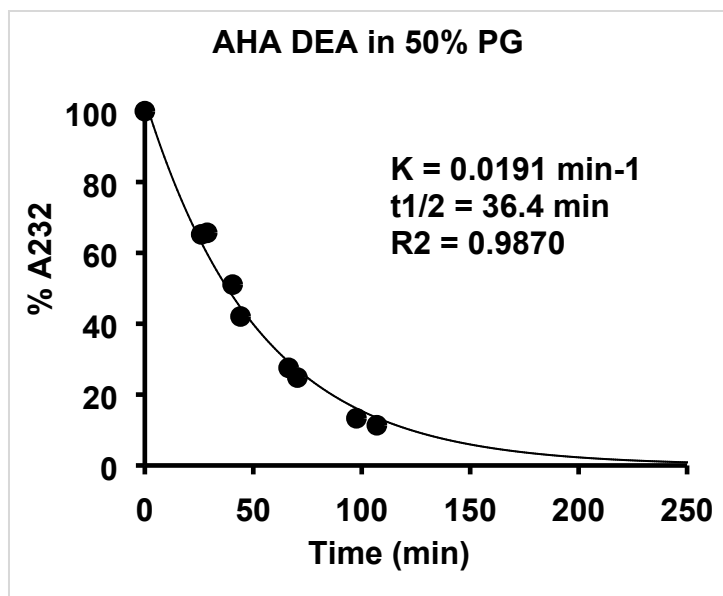

| Time (min) | % A232 |
|------------|--------|
| 0.0        | 100.00 |
| 26.0       | 65.22  |
| 28.7       | 65.67  |
| 40.5       | 51.05  |
| 44.1       | 42.05  |
| 66.3       | 27.56  |
| 70.3       | 24.81  |
| 97.6       | 13.32  |
| 107.0      | 11.35  |

Figure S27. Decomposition kinetic profile of A232 by AHA DEA in H<sub>2</sub>O/PG 1:1.

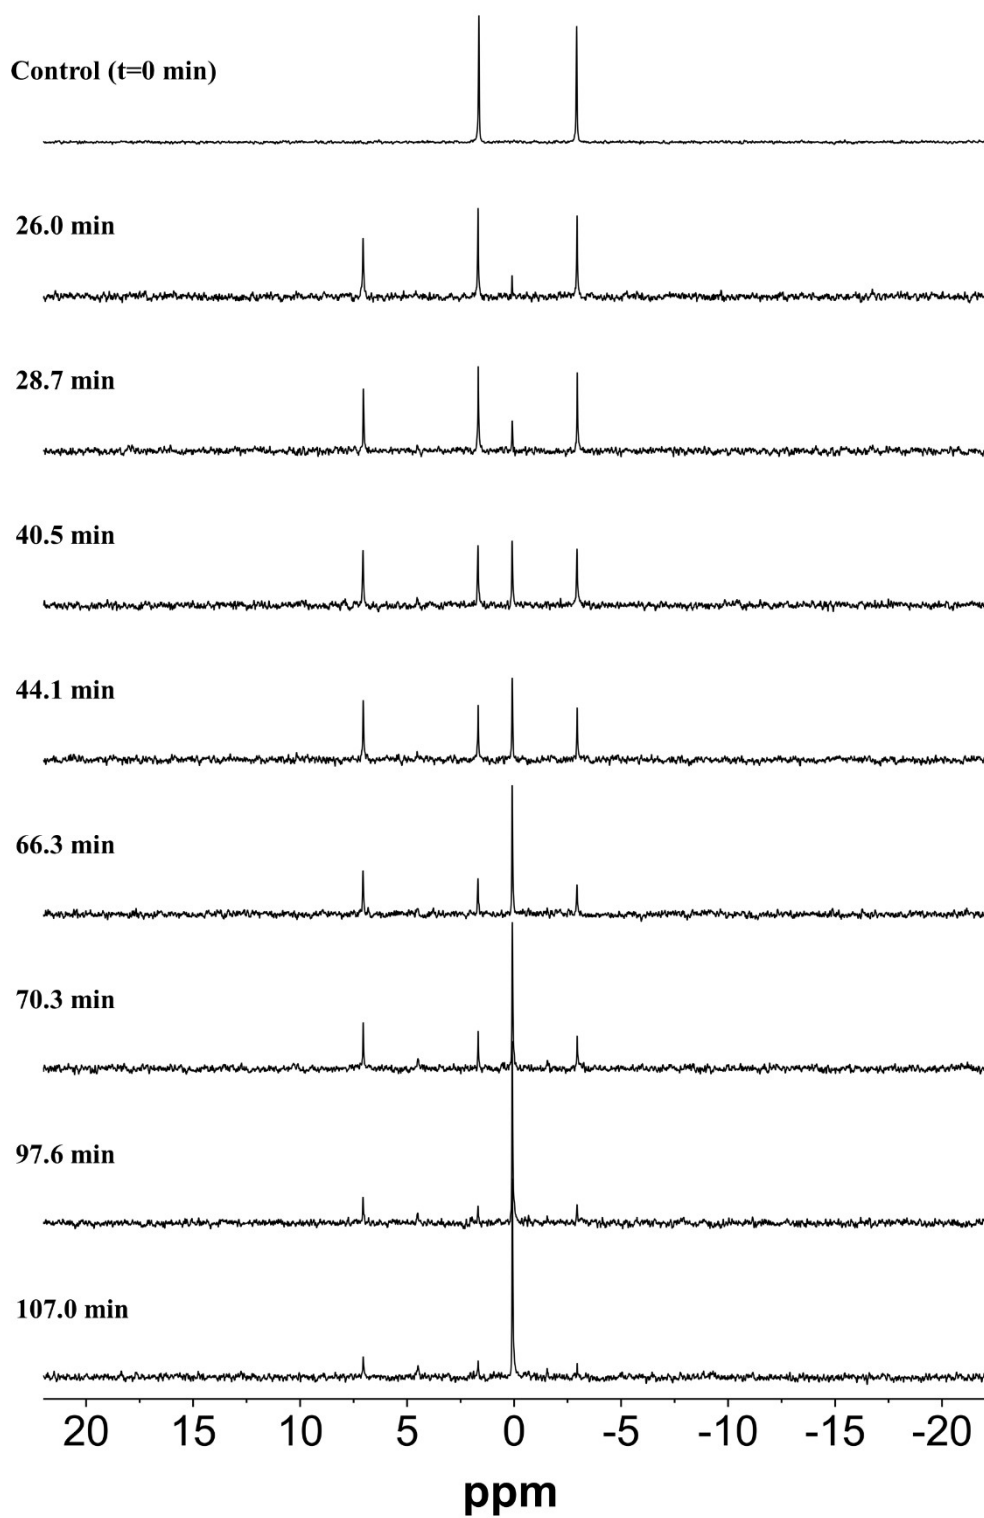

**Figure S28.** Stacked  $^{31}\text{P}$  NMR spectra presenting the decomposition of A232 by AHA DEA in  $\text{H}_2\text{O}/\text{PG}$  1:1.

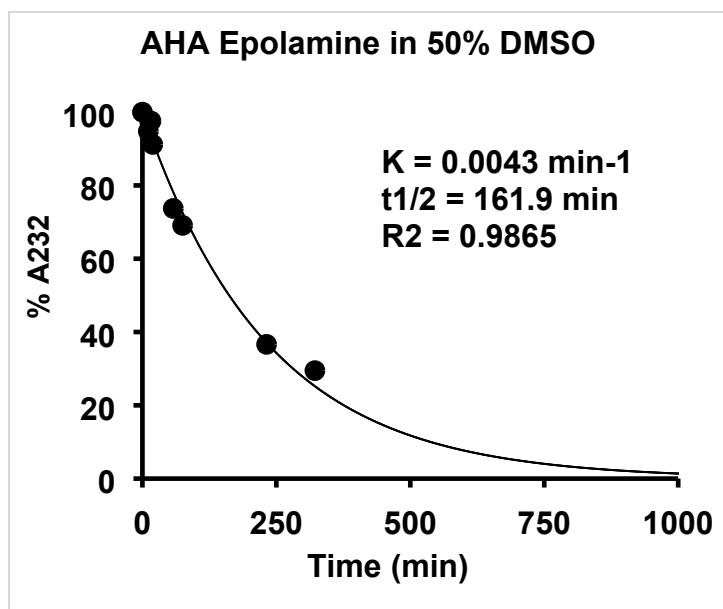

| Time (min) | % A232 |
|------------|--------|
| 0.0        | 100.00 |
| 11.0       | 94.78  |
| 13.7       | 97.46  |
| 16.0       | 97.57  |
| 19.3       | 91.18  |
| 57.6       | 73.73  |
| 75.0       | 69.10  |
| 231.7      | 36.63  |
| 322.0      | 29.47  |

**Figure S29.** Decomposition kinetic profile of A232 by AHA Epolamine in H<sub>2</sub>O/DMSO 1:1.



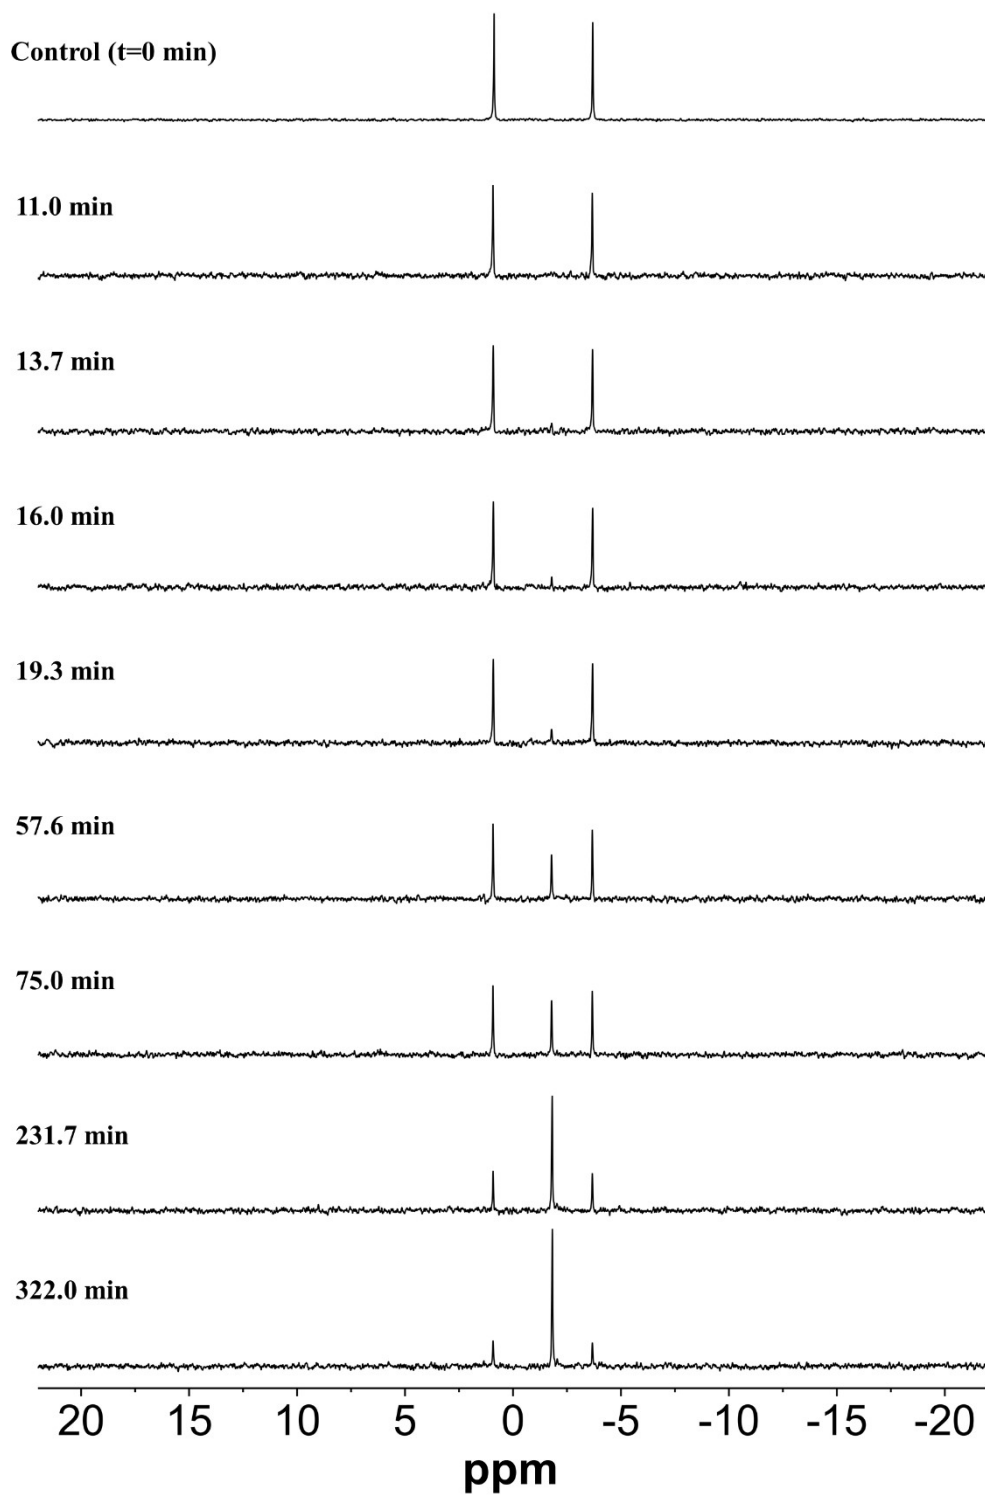

**Figure S30.** Stacked  $^{31}\text{P}$  NMR spectra presenting the decomposition of A232 by AHA Epolamine in  $\text{H}_2\text{O}/\text{DMSO}$  1:1.

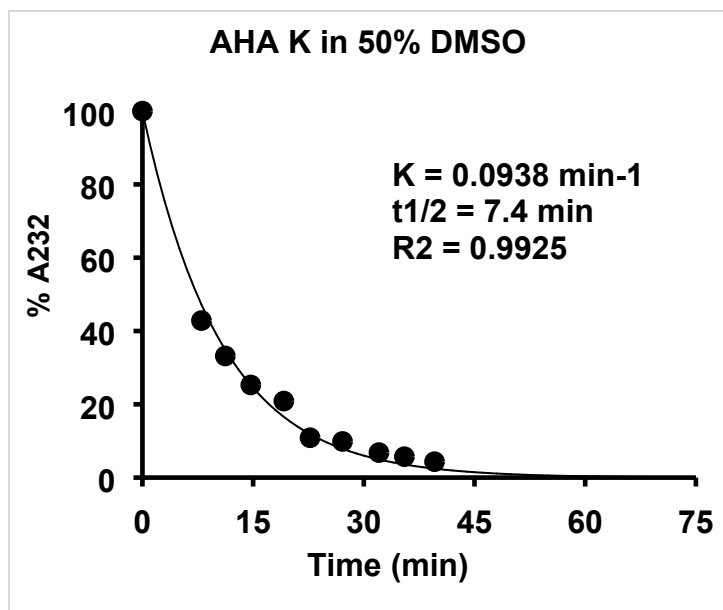

| <b>Time (min)</b> | <b>% A232</b> |
|-------------------|---------------|
| 0.0               | 100.00        |
| 8.0               | 42.85         |
| 11.2              | 33.19         |
| 14.7              | 25.28         |
| 19.2              | 20.88         |
| 22.7              | 10.87         |
| 27.1              | 9.86          |
| 32.1              | 6.82          |
| 35.5              | 5.70          |
| 39.6              | 4.34          |

**Figure S31.** Decomposition kinetic profile of A232 by AHA K in H<sub>2</sub>O/DMSO 1:1.

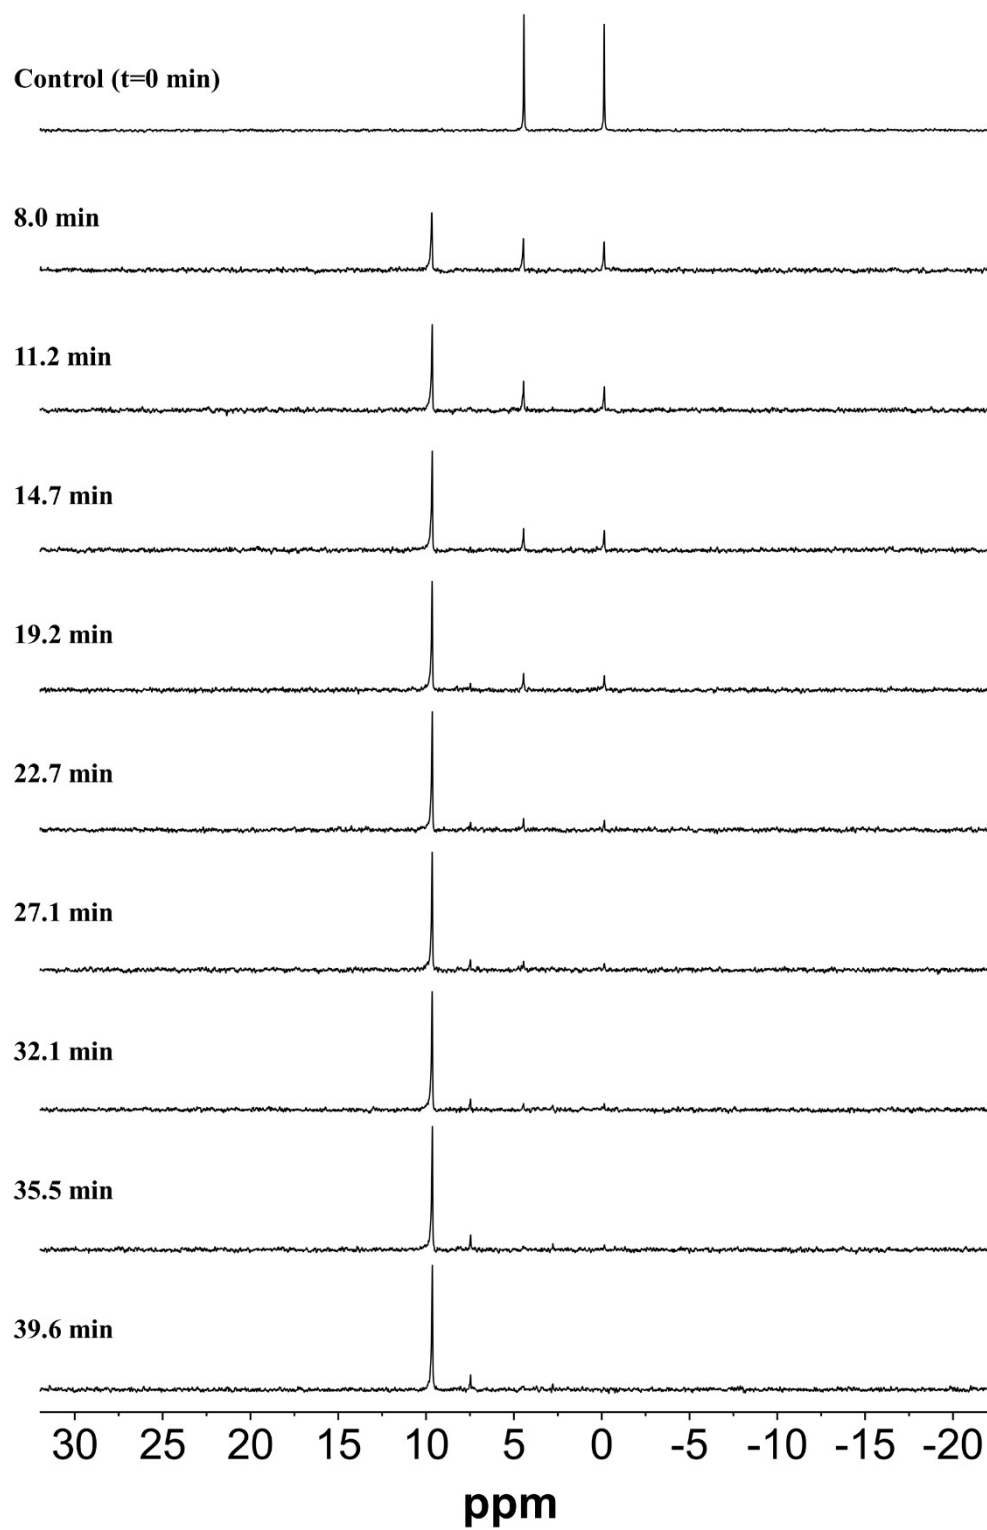

**Figure S32.** Stacked  $^{31}\text{P}$  NMR spectra presenting the decomposition of A232 by AHA K in  $\text{H}_2\text{O}/\text{DMSO}$  1:1.

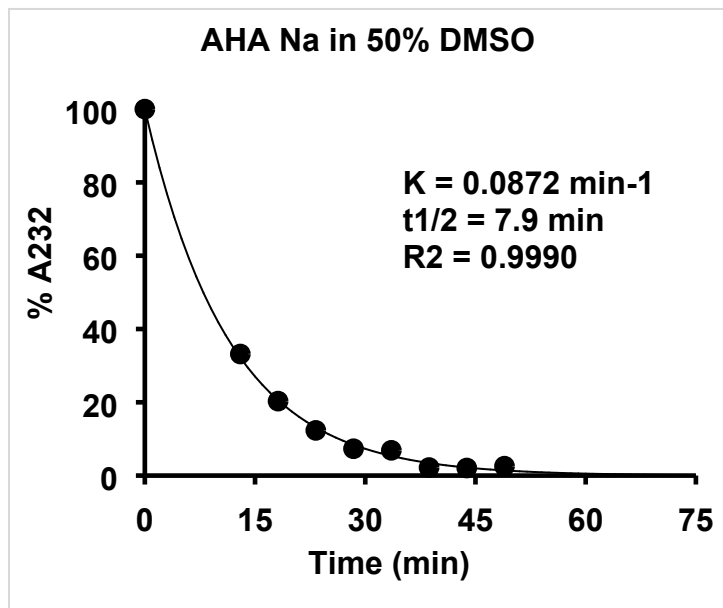

| Time (min) | % A232 |
|------------|--------|
| 0.0        | 100.00 |
| 13.0       | 33.17  |
| 18.1       | 20.32  |
| 23.3       | 12.33  |
| 28.4       | 7.33   |
| 33.6       | 6.89   |
| 38.7       | 2.20   |
| 43.8       | 2.07   |
| 49.0       | 2.57   |

**Figure S33.** Decomposition kinetic profile of A232 by AHA Na in H<sub>2</sub>O/DMSO 1:1.

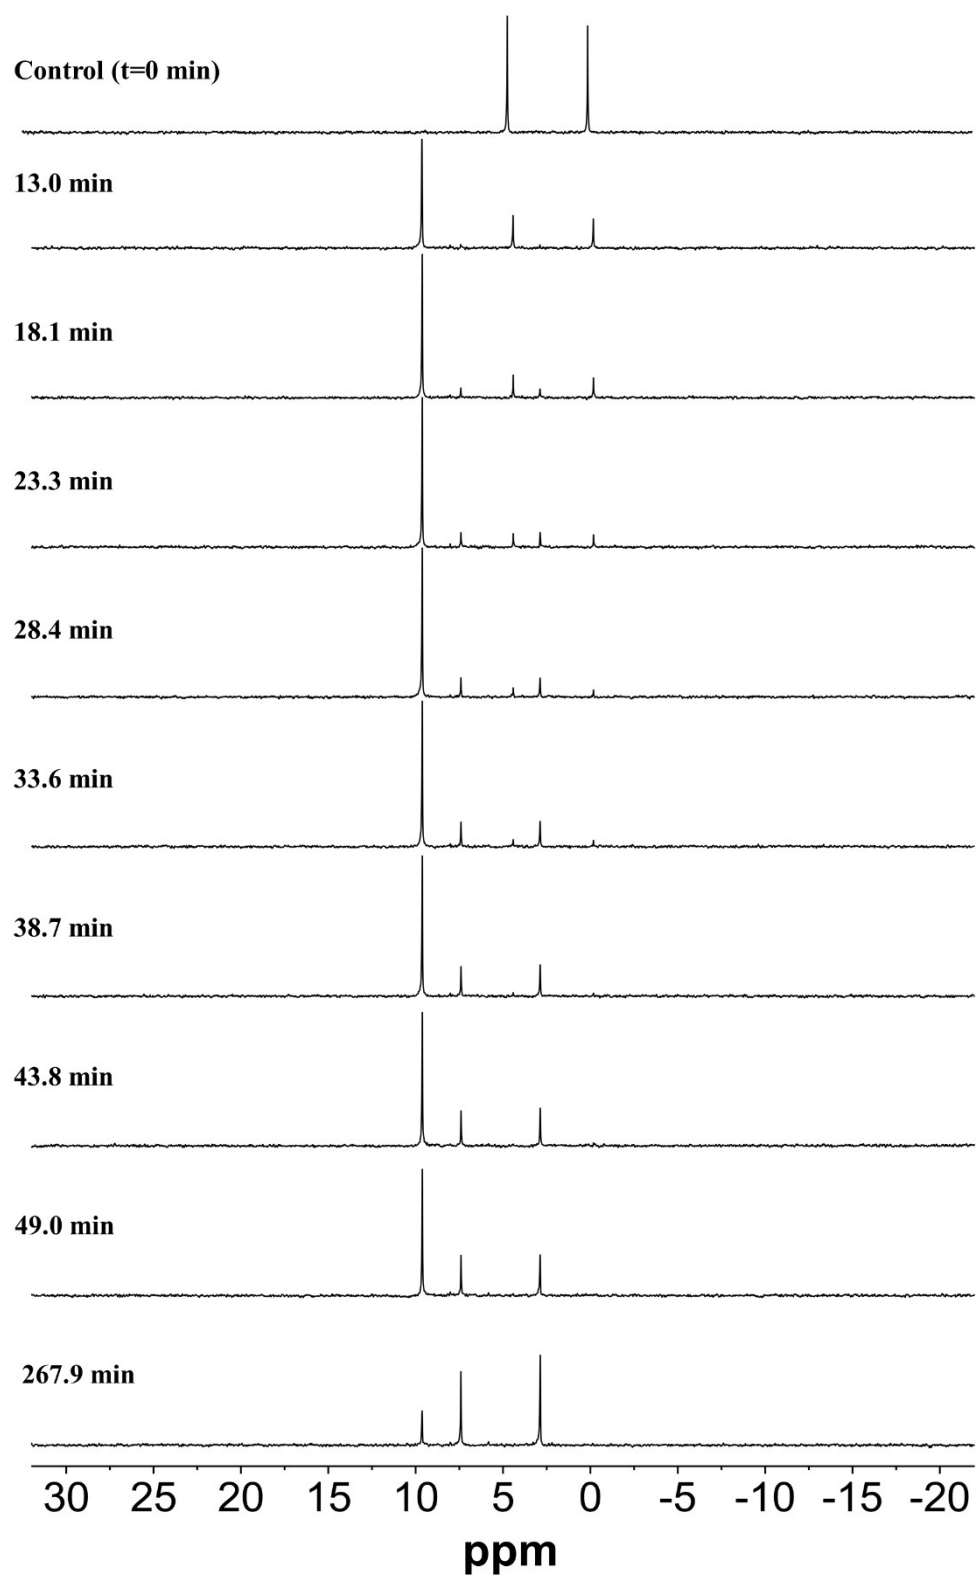

**Figure S34.** Stacked  $^{31}\text{P}$  NMR spectra presenting the decomposition of A232 by AHA Na in  $\text{H}_2\text{O}/\text{DMSO}$  1:1.

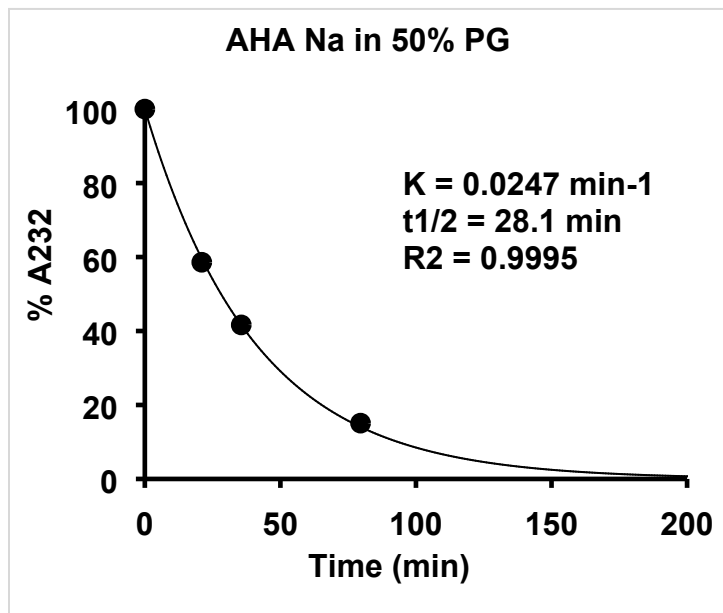

| Time (min) | % A232 |
|------------|--------|
| 0.0        | 100.00 |
| 21.0       | 58.59  |
| 35.6       | 41.65  |
| 79.6       | 15.09  |

**Figure S35.** Decomposition kinetic profile of A232 by AHA Na in H<sub>2</sub>O/PG 1:1.

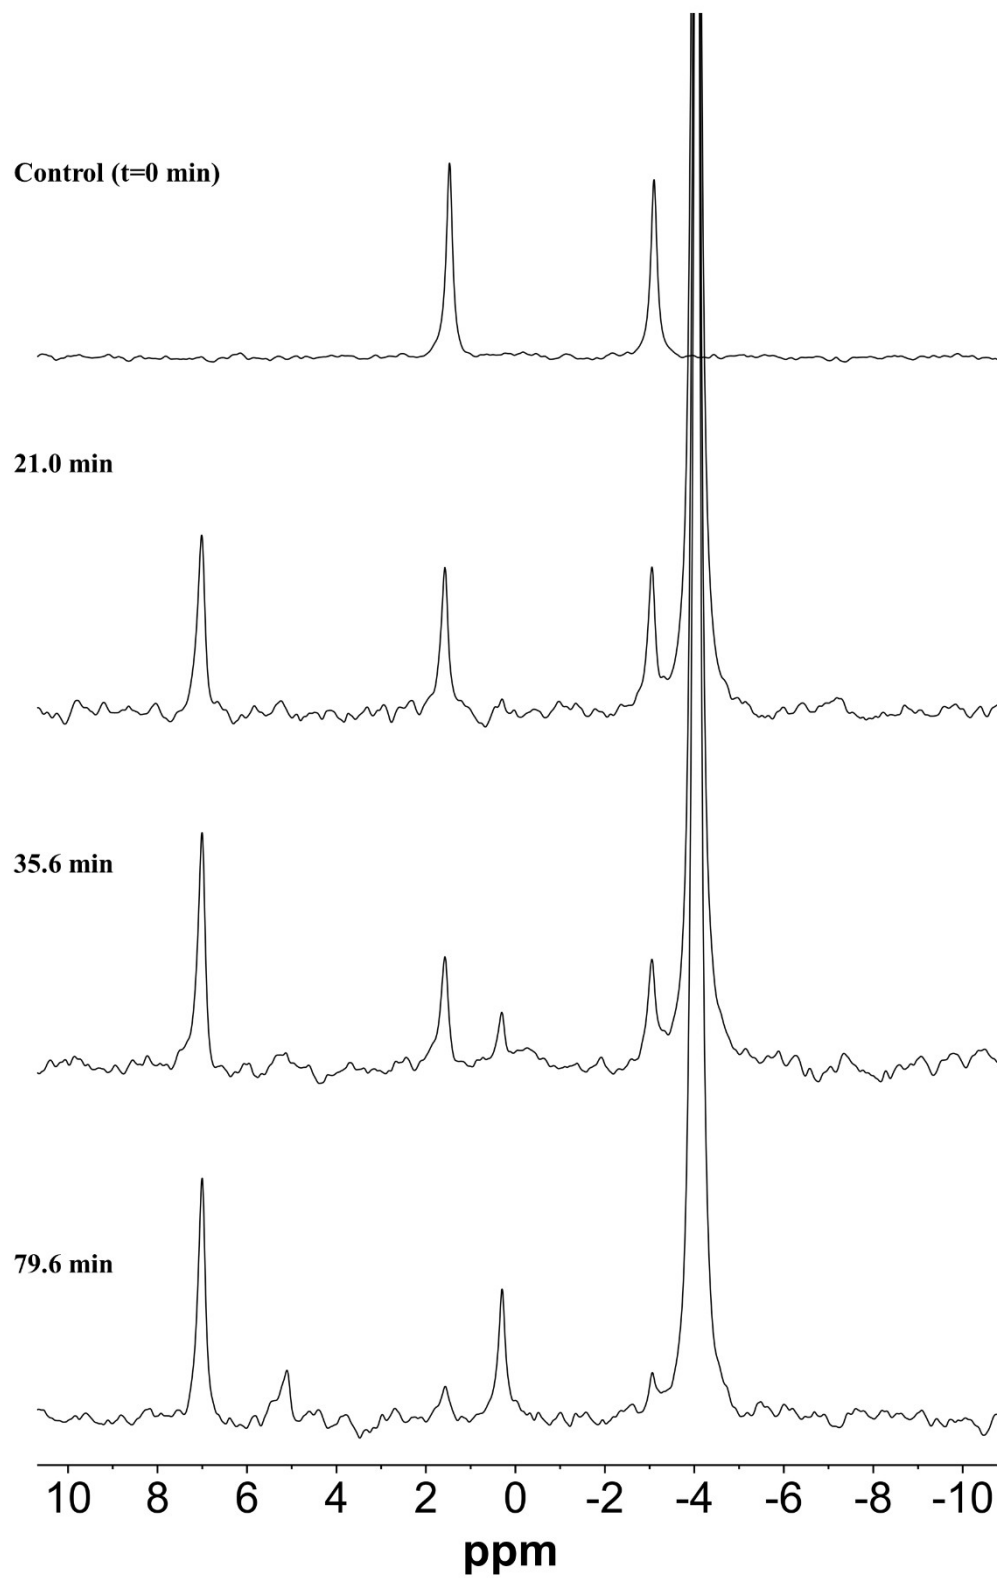

**Figure S36.** Stacked  $^{31}\text{P}$  NMR spectra presenting the decomposition of A232 by AHA Na in  $\text{H}_2\text{O}/\text{PG}$  1:1.

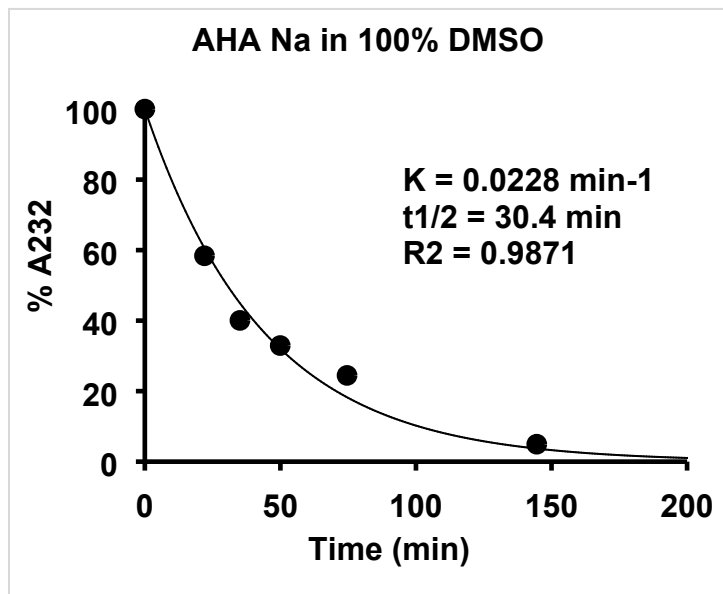

| <b>Time (min)</b> | <b>% A232</b> |
|-------------------|---------------|
| 0.0               | 100.00        |
| 22.0              | 58.40         |
| 35.1              | 40.06         |
| 49.9              | 32.93         |
| 74.6              | 24.46         |
| 144.6             | 4.95          |

**Figure S37.** Decomposition kinetic profile of A232 by AHA Na in DMSO.



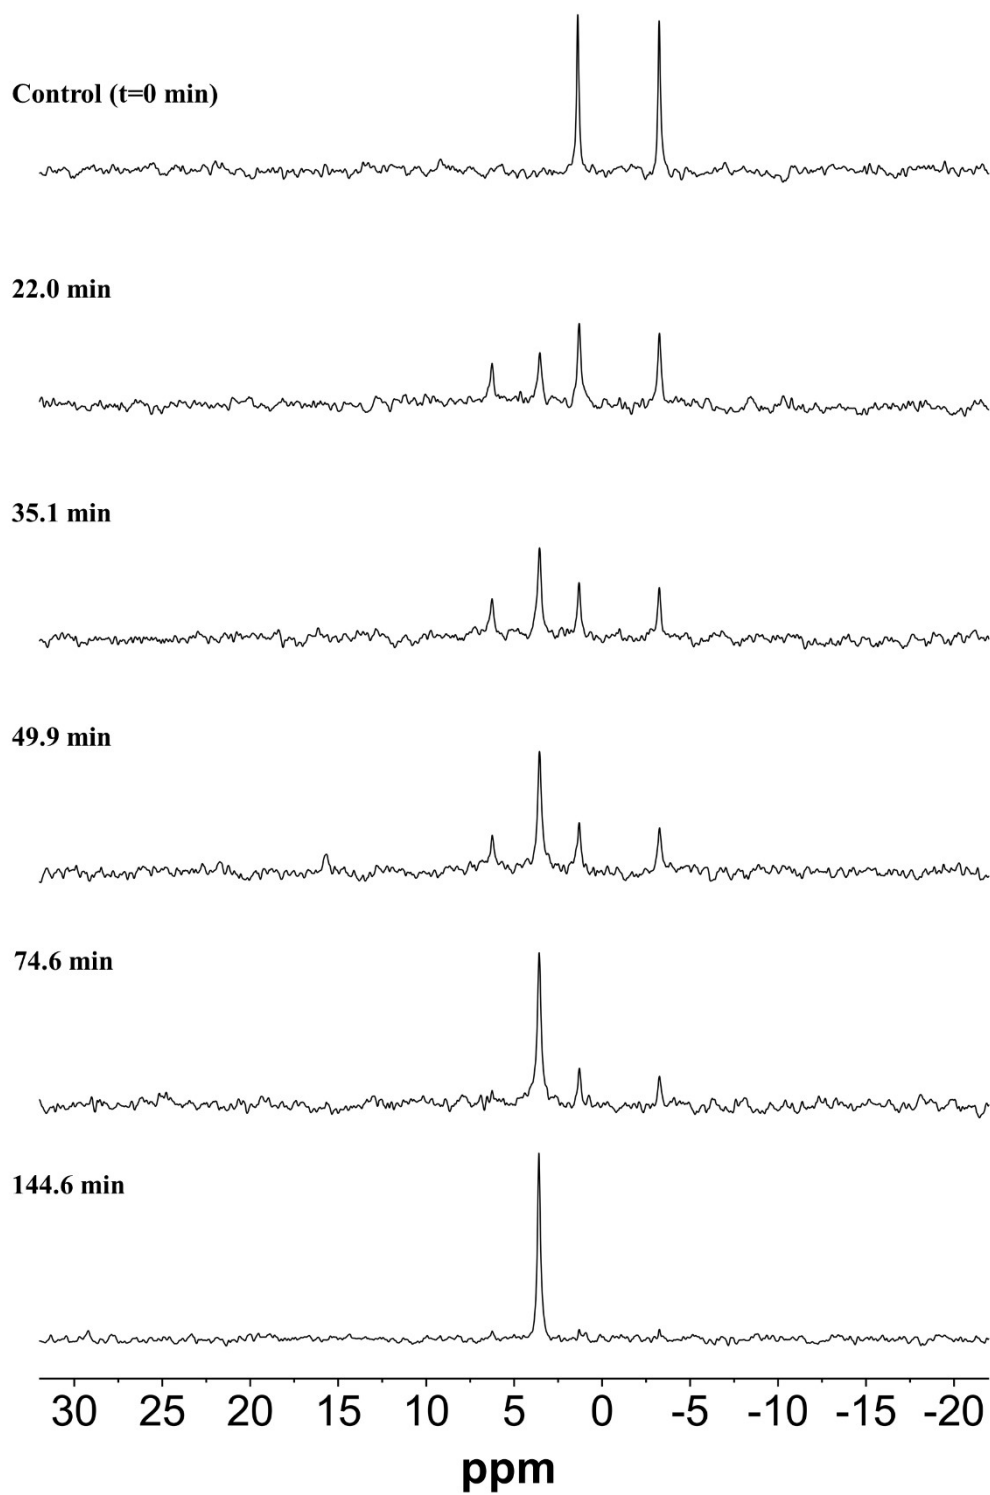

**Figure S38.** Stacked  $^{31}\text{P}$  NMR spectra presenting the decomposition of A232 by AHA Na in DMSO.

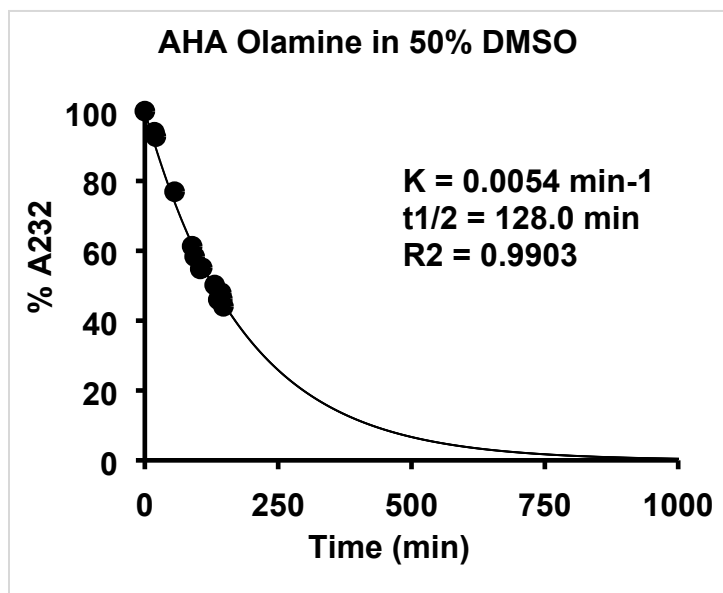

| <b>Time (min)</b> | <b>% A232</b> |
|-------------------|---------------|
| 0.0               | 100.00        |
| 18.0              | 93.96         |
| 20.6              | 92.70         |
| 55.7              | 76.92         |
| 88.7              | 61.31         |
| 93.4              | 58.37         |
| 103.9             | 54.82         |
| 107.5             | 55.14         |
| 130.9             | 50.20         |
| 137.7             | 46.03         |
| 143.2             | 47.98         |
| 145.3             | 46.23         |
| 147.3             | 44.10         |

**Figure S39.** Decomposition kinetic profile of A232 by AHA Olamine in H<sub>2</sub>O/DMSO 1:1.

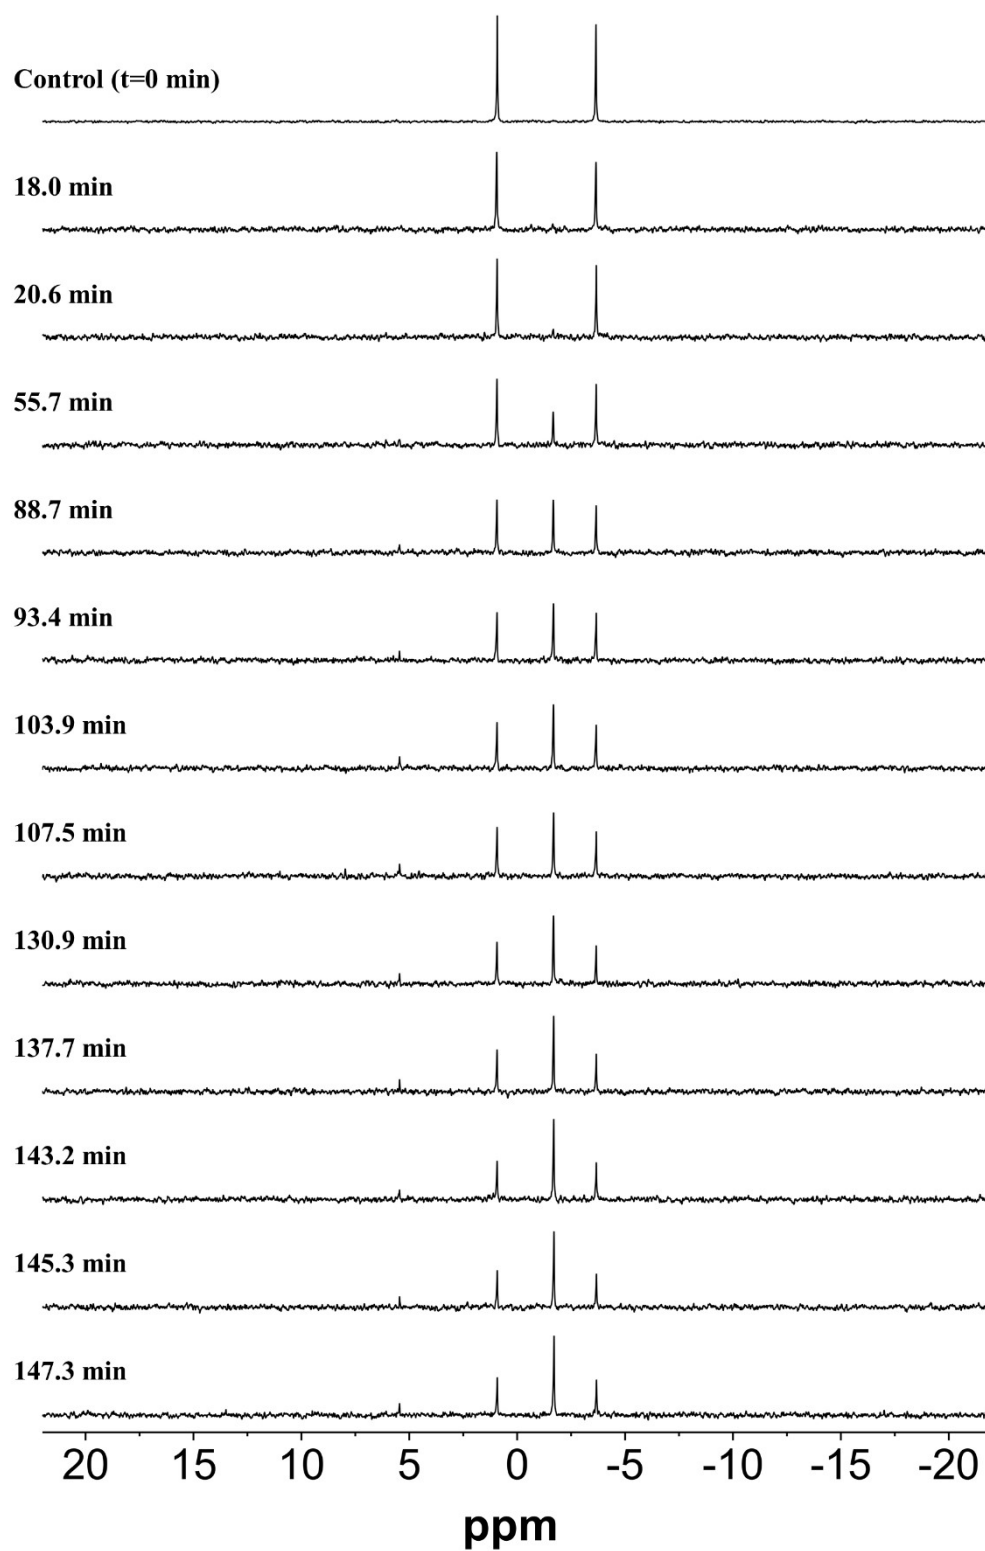

**Figure S40.** Stacked  $^{31}\text{P}$  NMR spectra presenting the decomposition of A232 by AHA Olamine in  $\text{H}_2\text{O}/\text{DMSO}$  1:1.

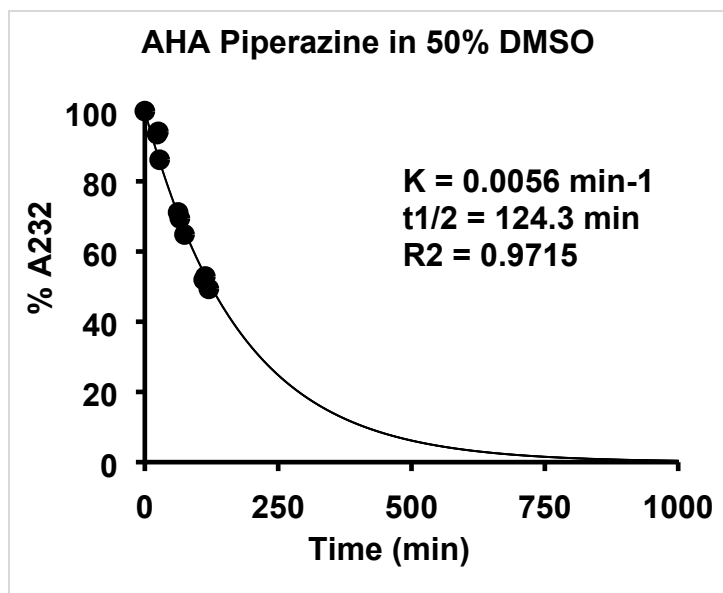

| <b>Time (min)</b> | <b>% A232</b> |
|-------------------|---------------|
| 0.0               | 100.00        |
| 23.0              | 93.46         |
| 25.3              | 94.09         |
| 27.8              | 86.14         |
| 62.4              | 71.14         |
| 65.7              | 69.45         |
| 74.4              | 64.84         |
| 110.4             | 51.95         |
| 113.4             | 52.89         |
| 120.0             | 49.37         |

**Figure S41.** Decomposition kinetic profile of A232 by AHA Piperazine in H<sub>2</sub>O/DMSO 1:1.

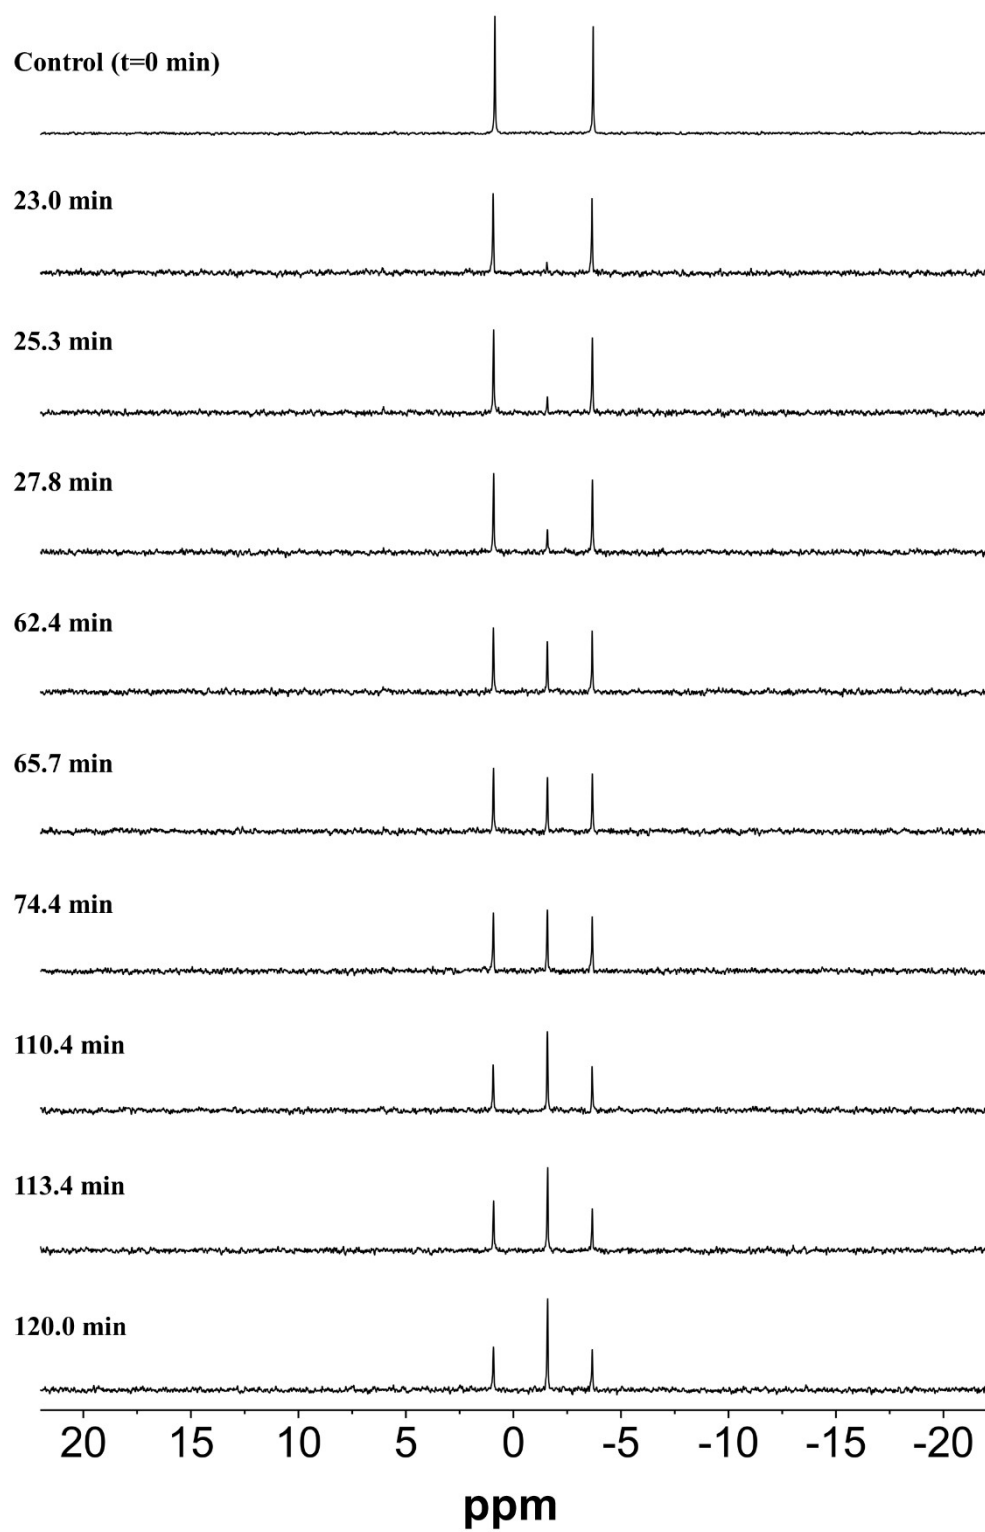

**Figure S42.** Stacked  $^{31}\text{P}$  NMR spectra presenting the decomposition of A232 by AHA Piperazine in  $\text{H}_2\text{O}/\text{DMSO}$  1:1.

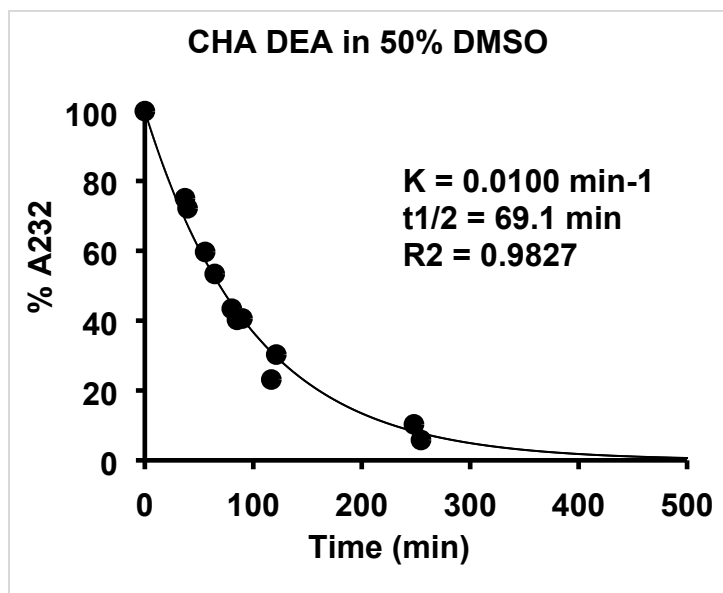

| Time (min) | % A232 |
|------------|--------|
| 0.0        | 100.00 |
| 37.0       | 75.06  |
| 39.4       | 72.18  |
| 55.6       | 59.68  |
| 64.4       | 53.38  |
| 80.2       | 43.41  |
| 85.0       | 40.24  |
| 90.0       | 40.62  |
| 116.6      | 23.14  |
| 121.2      | 30.29  |
| 248.2      | 10.30  |
| 254.6      | 5.83   |

**Figure S43.** Decomposition kinetic profile of A232 by CHA DEA in H<sub>2</sub>O/DMSO 1:1.

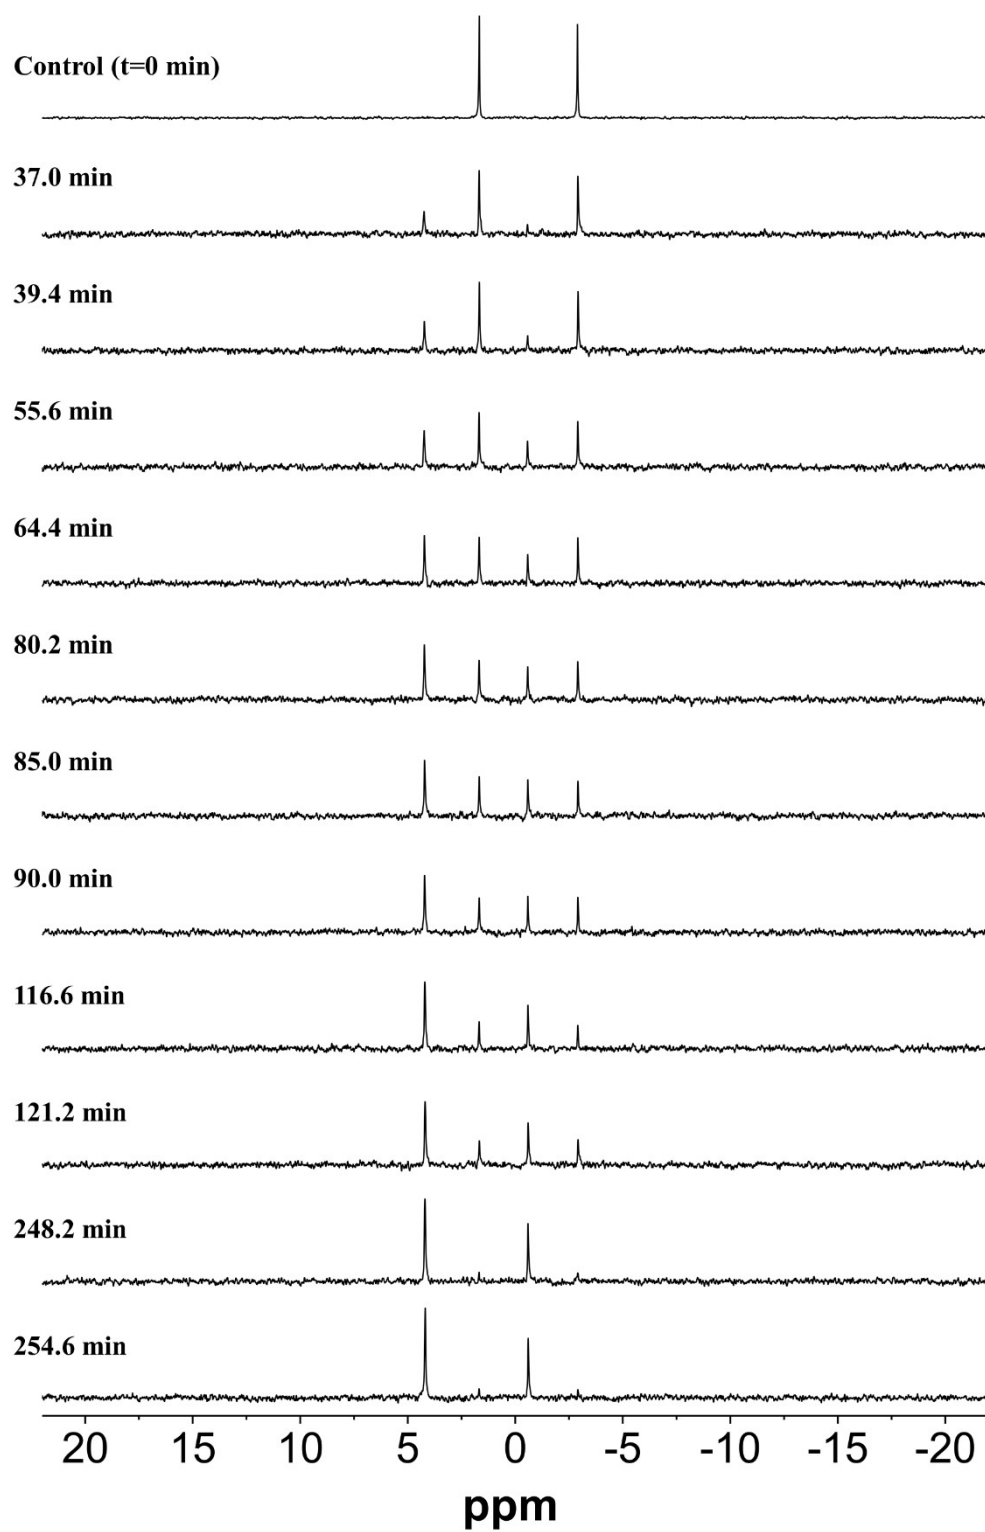

**Figure S44.** Stacked  $^{31}\text{P}$  NMR spectra presenting the decomposition of A232 by CHA DEA in  $\text{H}_2\text{O}/\text{DMSO}$  1:1.

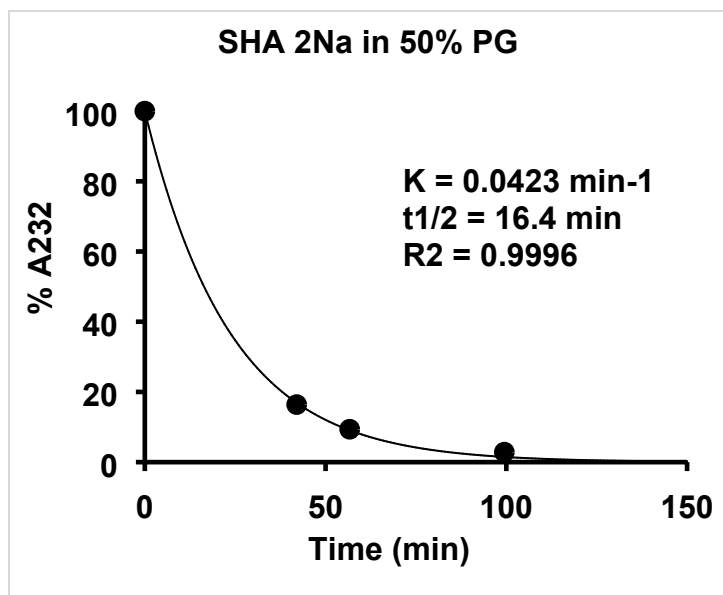

| <b>Time (min)</b> | <b>% A232</b> |
|-------------------|---------------|
| 0.0               | 100.00        |
| 42.0              | 16.40         |
| 56.7              | 9.37          |
| 99.5              | 2.85          |

**Figure S45.** Decomposition kinetic profile of A232 by SHA 2Na in H<sub>2</sub>O/PG 1:1.



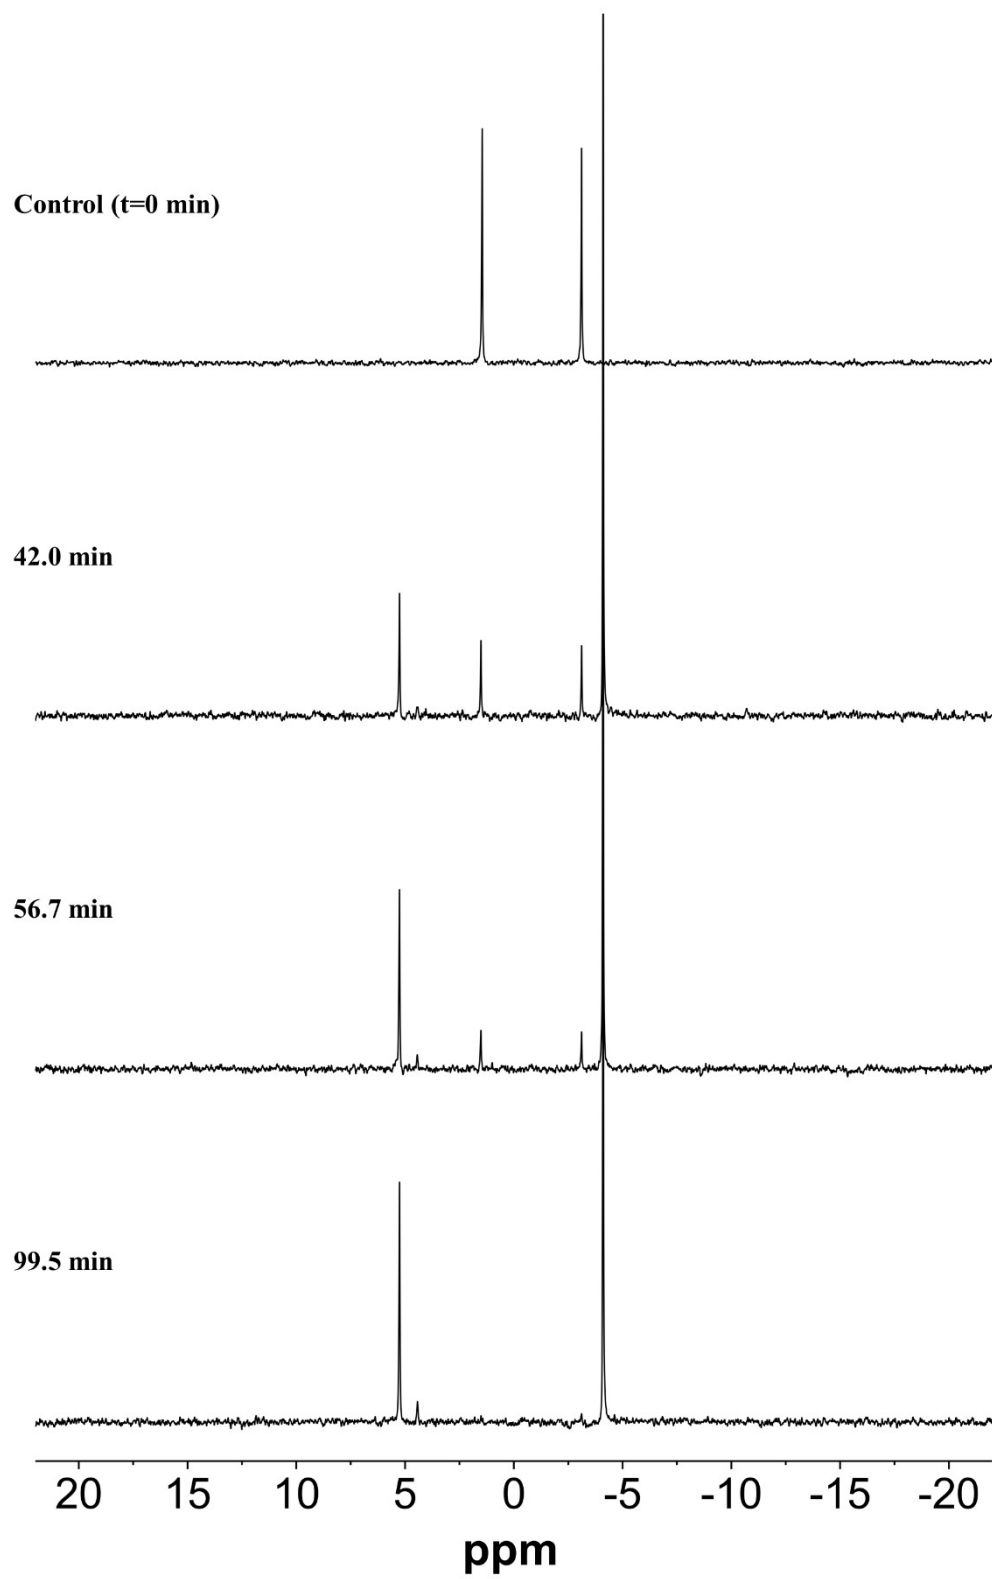

**Figure S46.** Stacked  $^{31}\text{P}$  NMR spectra presenting the decomposition of A232 by SHA 2Na in  $\text{H}_2\text{O}/\text{PG}$  1:1.

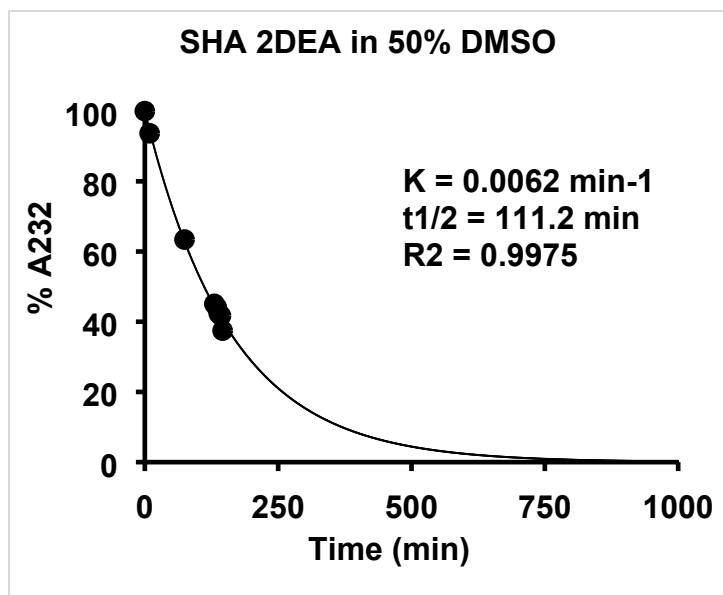

| Time (min) | % A232 |
|------------|--------|
| 0.0        | 100.00 |
| 9.0        | 93.69  |
| 74.4       | 63.41  |
| 130.4      | 45.09  |
| 135.0      | 44.08  |
| 138.6      | 42.34  |
| 142.7      | 41.70  |
| 145.8      | 37.47  |

Figure S47. Decomposition kinetic profile of A232 by SHA 2DEA in H<sub>2</sub>O/DMSO 1:1.

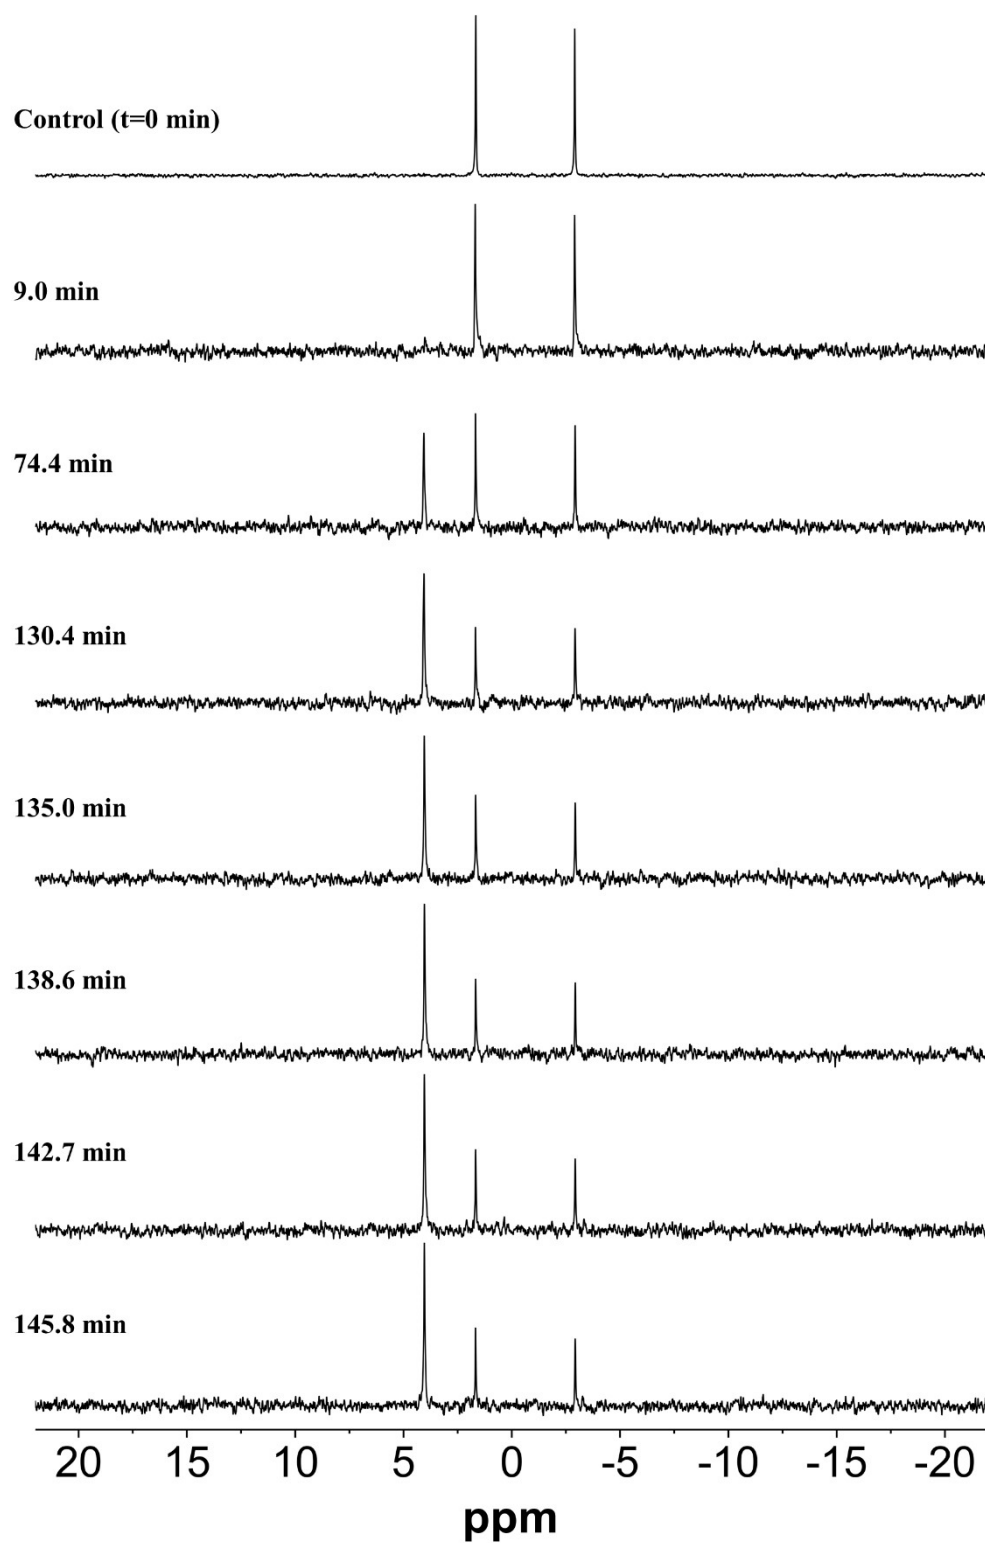

**Figure S48.** Stacked  $^{31}\text{P}$  NMR spectra presenting the decomposition of A232 by SHA 2DEA in  $\text{H}_2\text{O}/\text{DMSO}$  1:1.
